1 Heterogeneity in effective size across the  
2 genome: effects on the Inverse Instantaneous  
3 Coalescence Rate (IICR) and implications for  
4 demographic inference under linked selection

5 Simon Boitard\*, Armando Arredondo†, Camille Noûs‡,

6 Lounès Chikhi§,\*\*, Olivier Mazet†

7 \*: CBGP, Université de Montpellier, CIRAD, INRAE, Institut Agro, IRD,  
8 Montpellier, France.

9 †: Université de Toulouse, Institut National des Sciences Appliquées, In-  
10 stitut de Mathématiques de Toulouse, Toulouse, France.

11 ‡: Laboratoire Cogitamus, Toulouse, France.

12 §: Instituto Gulbenkian de Ciência, Oeiras, Portugal

13 \*\*: Laboratoire Évolution & Diversité Biologique (EDB UMR 5174), CNRS,  
14 IRD, UPS, Université de Toulouse Midi-Pyrénées, Toulouse, France

15 **Running title:**

16 The IICR under linked selection

17 **Keywords:**

18 demographic inference, linked selection, effective population size, coales-  
19 cence times, population structure, drosophila melanogaster, humans

20 **Corresponding author:**

21 Simon Boitard

22 CBGP, 755 avenue du Campus Agropolis, CS 30016, 34988 Montferrier sur

23 Lez cedex, France

24 [simon.boitard@inrae.fr](mailto:simon.boitard@inrae.fr)

25 0033 4 99 62 33 36

## 26 Abstract

27 The relative contribution of selection and neutrality in shaping species genetic diversity is  
28 one of the most central and controversial questions in evolutionary theory. Genomic data  
29 provide growing evidence that linked selection, i.e. the modification of genetic diversity  
30 at neutral sites through linkage with selected sites, might be pervasive over the genome.  
31 Several studies proposed that linked selection could be modelled as first approximation  
32 by a local reduction (e.g. purifying selection, selective sweeps) or increase (e.g. balancing  
33 selection) of effective population size ( $N_e$ ). At the genome-wide scale, this leads to a large  
34 variance of  $N_e$  from one region to another, reflecting the heterogeneity of selective con-  
35 straints and recombination rates between regions. We investigate here the consequences  
36 of this variation of  $N_e$  on the genome-wide distribution of coalescence times. The underly-  
37 ing motivation concerns the impact of linked selection on demographic inference, because  
38 the distribution of coalescence times is at the heart of several important demographic  
39 inference approaches. Using the concept of Inverse Instantaneous Coalescence Rate, we  
40 demonstrate that in a panmictic population, linked selection always results in a spurious  
41 apparent decrease of  $N_e$  along time. Balancing selection has a particularly large effect,  
42 even when it concerns a very small part of the genome. We quantify the expected mag-  
43 nitude of the spurious decrease of  $N_e$  in humans and *Drosophila melanogaster*, based on  
44  $N_e$  distributions inferred from real data in these species. We also find that the effect of  
45 linked selection can be significantly reduced by that of population structure.

## 46 Introduction

47 One of the greatest challenges of evolutionary biology is to understand how natural se-  
48 lection, mutation, recombination and genetic drift have shaped and are still shaping the

49 patterns of genomic diversity of species living today (Charlesworth, 2010, Lewontin, 1974,  
50 Walsh and Lynch, 2018). In the last decade genomic data have become increasingly avail-  
51 able for both model and non-model species. It is expected that by analysing these genomic  
52 data we will be able to better understand the respective roles of mutation and recombi-  
53 nation and characterize the relative importance of drift and selection in evolutionary  
54 processes (Charlesworth, 2010, Lewontin, 1974). In particular, it is believed that we will  
55 be able to identify the regions that have been shaped by selection, and those that may be  
56 more neutral (Johri et al., 2020, Pouyet et al., 2018). The relative importance of selection  
57 and neutrality in generating the genomic patterns of diversity we see today has been at  
58 the heart of many evolutionary debates and controversies over the last decades (Kimura,  
59 1983, Lewontin, 1974, Ohta, 1992) and recent studies suggest that it still is (Comeron,  
60 2017, Jensen et al., 2019, Kern and Hahn, 2018).

61 The concept of effective size ( $N_e$ ) is central to these debates (Charlesworth, 2009)  
62 because selection is expected to be more efficient when  $N_e$  is large, and genetic drift to  
63 be the main driver of evolutionary change when  $N_e$  is small (Ohta, 1992). For instance,  
64 Charlesworth (2009) notes that it is expected that an autosomal locus under positive  
65 selection will behave neutrally when  $s < 1/4N_e$ , where  $s$  is the selection intensity at this  
66 locus. At the same time it is commonly assumed that selection will itself imply a variation  
67 of  $N_e$  across the genome (Charlesworth, 2009, Gossmann et al., 2011, Jiménez-Mena et al.,  
68 2016b). For instance, Gossmann et al. (2011) write that “*The effective population size*  
69 *is expected to vary across the genome as a consequence of genetic hitchhiking (Smith and*  
70 *Haigh, 1974) and background selection (Charlesworth et al., 1993)*”. They add that “*The*  
71 *action of both positive and negative natural selection, is expected to reduce the effective*  
72 *population size leading to lower levels of genetic diversity and reduced effectiveness of*  
73 *selection.*” They also stress that “*The evidence that there is variation in  $N_e$  within a*

74 *genome comes from three sources. First, it has been shown that levels of neutral genetic*  
75 *diversity are correlated to rates of recombination in *Drosophila* [...], humans [...], and*  
76 *some plant species...”. In his 2009 review on the concept of  $N_e$  Charlesworth (2009)*  
77 *made a similar comment: “ $N_e$  may also vary across different locations in the genome of a*  
78 *species [...] because of the effects of selection at one site in the genome on the behaviour of*  
79 *variants at nearby sites”. More recently, Jiménez-Mena et al. (2016a) stated that “recent*  
80 *studies [...] suggest that different segments of the genome might undergo different rates*  
81 *of genetic drift, potentially **challenging the idea that a single  $N_e$  can account for***  
82 ***the evolution of the genome”** (emphasis ours).*

83 Under these explicit or implicit modelling frameworks, genomic regions with limited  
84 genetic diversity are thus seen as regions of low  $N_e$  as a result of selective sweeps (Smith  
85 and Haigh, 1974) or background selection (Charlesworth et al., 1993), whereas regions  
86 with very high levels of genetic diversity may be seen as regions of large  $N_e$  and could  
87 be explained by balancing selection (Charlesworth, 2009) (see also Hill and Robertson  
88 (1966)). Following that rationale, Jiménez-Mena et al. (2016b) suggested that different  
89 species might thus differ in the statistical distribution of  $N_e$  across the genome and they  
90 presented such distributions for eleven species.

91 Given the central role played by the  $N_e$  concept to detect, identify, and even *conceptual-*  
92 *ize* selection, it may be important, perhaps even enlightening, to explore the consequences  
93 of the ideas presented above with the concept of IICR (inverse instantaneous coalescence  
94 rate) recently introduced by Mazet et al. (2016). Indeed, the IICR is equivalent to the  
95 past temporal trajectory of  $N_e$ , previously defined as the coalescent  $N_e$  (Sjödín et al.,  
96 2005), in a panmictic population under neutrality, and it is the quantity estimated by the  
97 popular PSMC method of Li and Durbin (2011). The IICR was first defined by Mazet  
98 et al. (2016) for a sample size of two and its properties were studied under several models

99 of population structure (Chikhi et al., 2018, Grusea et al., 2018, Rodríguez et al., 2018)  
100 and it has been shown that it can be used for demographic inference under neutrality  
101 and models of population structure Arredondo et al. (2021), Chikhi et al. (2018). These  
102 studies showed that the IICR will significantly change over time when populations are  
103 structured, even when population size is actually constant. They also outlined that the  
104 IICR not only depends on the model of population structure but also on the sampling  
105 scheme, which questions the notion that an  $N_e$  can be easily associated to (or is a property  
106 of) the model of interest when the model is structured (Chikhi et al., 2018, Rodríguez  
107 et al., 2018). The reason for this dependency is that the IICR is by definition a function  
108 of the distribution of coalescence times for two genes ( $T_2$ ), which is itself a function of  
109 both the evolutionary model and the location (in time and space) of the sampled genes.

110 One important assumption of the IICR studies mentioned above is that this distri-  
111 bution of  $T_2$  is homogeneous along the genome. The IICR, as defined and computed in  
112 previous studies, is thus a genomic average assuming that all loci follow a single Wright-  
113 Fisher model with or without population structure but with the same number of haploid  
114 genes. Whichever definition of  $N_e$  one assumes, the underlying model assumes that  $N_e$  is  
115 constant along the genome. If we now assume that there is an  $N_e$  that varies across the  
116 genome as a consequence of selection (even as an approximation) then the IICR should  
117 be a function of the underlying distribution of these  $N_e$  values across the sampled genes.  
118 Genomic regions under different selection regimes might then exhibit specific signatures  
119 leading to differing IICR curves for each region. Alternatively, these regions might not be  
120 easy to identify but they might still influence the average genomic IICR estimated from  
121 sequenced genomes. In the present study we thus wish to explore ideas related to drift,  
122 selection and patterns of genomic diversity by studying the consequences of this putative  
123 genomic variation of  $N_e$  on the IICR.

124 We first study the IICR under panmixia and constant population size but assuming  
125 that  $N_e$  can vary across the genome, using hypothetical distributions of  $N_e$  and distribu-  
126 tions inferred from genomic data. We then generalise the model to integrate population  
127 structure or population size variation through time. In particular we consider a structured  
128 model in which we allow several classes of genomic regions to evolve under different n-  
129 island models each characterized by a specific deme size. We also apply this approach to a  
130 structured model inferred for humans, which includes temporal variations of the migration  
131 rate between demes. Finally, we consider temporal variations of the genomic  $N_e$  to model  
132 possible transitory effects of selection under panmixia. Altogether, we advocate the use  
133 of the IICR as a concept that may help clarify what  $N_e$  means and as one way, among  
134 others, to improve our understanding of the recent and ancient evolutionary history of  
135 species.

## 136 **The IICR under panmixia with several classes of (con-** 137 **stant size) $N_e$ along the genome**

### 138 **Model**

139 We assume that the genome can be divided in  $K$  independent classes, each of them  
140 characterized by a different  $N_e$  that is constant over time. To model these differences of  
141  $N_e$ , we consider that each class  $i$  ( $i = 1 \dots K$ ) evolves under a constant size Wright-Fisher  
142 (WF) model (*i.e.* panmictic with non-overlapping generations) with diploid population  
143 size  $\lambda_i N$  ( $2 \lambda_i N$  haploids), for some reference population size  $N$  corresponding to the  
144 actual number of diploids. Note that  $2N$  represents an actual number of haploid genomes  
145 and that under the WF model, there is no ambiguity and  $N$  represents the  $N_e$  under

146 neutrality. Thus,  $\lambda_i$  reflects the ratio of effective population size  $N_e$  in class  $i$  relative to  
147  $N$  and for convenience we may sometimes refer to  $\lambda_i$  as *the* effective population size in  
148 class  $i$ . Assuming that  $N$  is large (i.e. that all  $\lambda_i N$  are large), we rescale time by units  
149 of  $2N$  generations and study the coalescence process resulting from this model. If we  
150 sample in the present (at time  $t = 0$ )  $k$  genes for a locus from the  $i^{\text{th}}$  class of the genome,  
151 the genealogy of this sample will follow a standard coalescent model with coalescence  
152 rate  $\mu_i = \frac{1}{\lambda_i}$  between any pair of sequences. This model is associated to the successive  
153 coalescence times  $T_j^i$ ,  $j = k \dots 2$ , where  $T_j^i$  is the coalescence time of  $j$  lineages sampled  
154 in the class  $i$ .

155 We will study the properties of the IICR under this model. As a reminder, the IICR  
156 was originally defined for a sample of size  $k = 2$  by Mazet et al. (2016), who showed how it  
157 could be computed for any model for which  $T_2$  values could be generated (*i.e.* any model  
158 under the coalescent possibly involving complex population structure and population size  
159 changes).

160 One important assumption of the previous IICR studies was that the coalescence times  
161 obtained along the genome are sampled from the same distribution (under neutrality).  
162 Here this distribution will depend on class  $i$ . More precisely, the distribution of  $T_2^i$  is the  
163 exponential distribution with parameter  $\mu_i = \frac{1}{\lambda_i}$ , whose probability density function (pdf)  
164 is

$$f_i(t) = \mu_i e^{-\mu_i t}, i = 1 \dots K.$$

165 If the sampled loci are uniformly distributed along the genome and represent an unbiased  
166 sample of the genomic  $\lambda_i$  values, and if we denote by  $a_i$  the proportion of the genome  
167 corresponding to class  $i$ , we will then infer a genomic distribution of coalescence time with



168 pdf

$$f(t) = \sum_{i=1}^K a_i f_i(t) = \sum_{i=1}^K a_i \mu_i e^{-\mu_i t}. \quad (1)$$

## 169 IICR expression and main properties

170 Denoting  $F$  the cumulative distribution function of  $T_2$  and  $f(t) = F'(t)$  its pdf, the IICR  
171 can be defined Mazet et al. (2016) in the most general case as:

$$\text{IICR}(t) = \frac{R(t)}{f(t)}$$

172 where

$$R(t) = \mathbb{P}(T_2 \geq t) = 1 - F(t).$$

173 For our model with  $K$  different  $\lambda_i$ , we then have from equation (1):

$$\text{IICR}(t) = -\frac{R(t)}{R'(t)} = \frac{\sum_{i=1}^K a_i e^{-\mu_i t}}{\sum_{i=1}^K a_i \mu_i e^{-\mu_i t}}. \quad (2)$$

174 Thus, the first result on the IICR is that, despite the panmixia and constant size of the  
175 population, it is straightforward to see that the IICR is not constant as soon as there  
176 are at least two different values of  $\lambda_i$  with non null proportion  $a_i$  across the genome. In  
177 other words, the assumption that there is more than one  $N_e$  in the genome means that  
178 the IICR will change with time. Classical interpretations of PSMC plots under panmixia  
179 will thus lead to the conclusion that the population size changed through time.

180 To be more specific on the nature of these changes, we now obtain the derivative of  
181 the IICR as a function of time (backward from present):

$$\text{IICR}'(t) = \frac{R(t)R''(t) - R'(t)^2}{R'(t)^2}$$

182 which has the sign of

$$\begin{aligned} R(t)R''(t) - R'(t)^2 &= \sum_{i=1}^K a_i e^{-\mu_i t} \sum_{j=1}^K a_j \mu_j^2 e^{-\mu_j t} - \sum_{i=1}^K a_i \mu_i e^{-\mu_i t} \sum_{j=1}^K a_j \mu_j e^{-\mu_j t} \\ &= \sum_{i=1}^K \sum_{j \neq i} a_i e^{-\mu_i t} a_j e^{-\mu_j t} \mu_j^2 - \sum_{i=1}^K \sum_{j \neq i} a_i e^{-\mu_i t} a_j e^{-\mu_j t} \mu_i \mu_j \\ &= \sum_{i=1}^K \sum_{j > i} a_i e^{-\mu_i t} a_j e^{-\mu_j t} (\mu_i^2 + \mu_j^2 - \mu_i \mu_j - \mu_j \mu_i) \\ &= \sum_{i=1}^K \sum_{j > i} a_i e^{-\mu_i t} a_j e^{-\mu_j t} (\mu_i - \mu_j)^2 \end{aligned}$$

183 This quantity is always positive so we can conclude that the IICR is *always increasing*  
 184 from  $t = 0$  to  $t = +\infty$  (*i.e.* backward in time). In a stationary panmictic population,  
 185 the fact that there are at least two  $N_e$  across the genome ( $\lambda_i, i > 1$ ) means that we will  
 186 always infer a decreasing IICR (forward in time) typically interpreted as an apparent  
 187 but spurious population size decrease. Interestingly, it could also be interpreted as the  
 188 spurious presence of population structure since population structure can also generate  
 189 similar changes in the IICR.

## 190 Detailed results with a two-class model

191 These properties can be observed in Figure 1 where we represent the simplest case with  
 192  $K = 2$  classes of genomic regions. In this figure we present the IICRs for  $\lambda_1 = 0.1$

193 and  $\lambda_2 = 1$ , for proportions of  $\lambda_2$  (represented by the parameter  $a_2$ ) varying from 0  
194 to 1. Consistent with the choice made in most studies inferring past population size  
195 changes, time is plotted in log10 scale in this Figure and all others shown in the main text.  
196 Equivalent figures with time plotted in natural scale are provided in the Supplementary  
197 Material, because they may sometimes lead to slightly different interpretations.

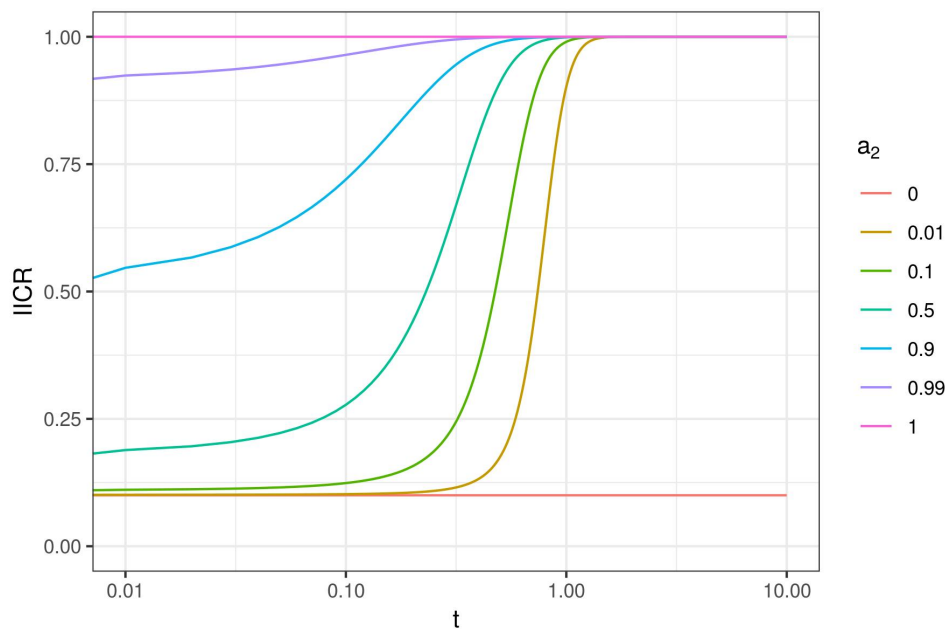

Figure 1: IICR curves for a panmictic model with  $K = 2$  classes of genomic regions with constant size. Genomic regions of class  $i$  ( $i = 1, 2$ ) have a constant population size  $\lambda_i N$ , with  $\lambda_1 = 0.1$  and  $\lambda_2 = 1$ . Their frequencies are  $a_1$  and  $a_2$ , respectively, with  $a_1 + a_2 = 1$ . The IICR curves are represented for  $a_2$  values (representing neutrality, see main text) varying between zero and one. Time is plotted in log10 scale.

198 To simplify the interpretation of our results, we consider (by convention) throughout  
199 this manuscript that  $\lambda_i = 1$  corresponds to the neutral regions of the genome, whether  
200  $a_i$ , their relative proportion in the genome, is large or not. We thus do not necessarily

201 consider that most of the genome is neutral in that sense. In this setting and in Figure 1,  
202 where  $\lambda_1 = 0.1$  and  $\lambda_2 = 1$ ,  $a_1$  can be interpreted as the fraction of the genome showing  
203 reduced  $N_e$  by a multiplicative factor  $\lambda_1 = 0.1$  as a consequence of positive or background  
204 selection.

205 Figure 1 thus shows that for small values of  $a_2$  (*i.e.* when most of the genome is under  
206  $N_e$ -reducing selection) the IICR is S-shaped, slowly increasing backward from  $\lambda_1 = 0.1$   
207 in the recent past to a plateau at  $\lambda_2 = 1$  in the ancient past. For increasing  $a_2$  values  
208 the IICR curves are becoming flatter as their left-most section flattens upward. When  
209 using a natural time scale (Figure S1) the curves simply seem to be shifted to the left for  
210 increasing  $a_2$  values, the S shape being lost due to the truncation of the leftmost part of  
211 the curve. In other words, these curves start (in recent times) at increasing IICR values  
212 above  $\lambda_1 = 0.1$  when the value of  $a_2$  increases, but the curves always reach the same  
213 plateau at  $\lambda_2 = 1$ . However, and this is an important point, this plateau is reached earlier  
214 as  $a_2$  increases. When  $a_2=1$ , only the plateau remains and the IICR is flat at  $\lambda_2 = 1$  and  
215 when  $a_2 = 0$ , it is a flat at  $\lambda_1 = 0.1$ . Thus, when there is only one  $\lambda_i$  over the genome,  
216 the IICR is constant over time and equal to that value, as expected for a population with  
217 constant size  $\lambda_i N$ .

218 If we now assume that the only type of selection present in the genome increases the  
219 effective size by an order of magnitude, with  $a_1$  and  $a_2$  corresponding to  $\lambda_1 = 1$  and  
220  $\lambda_2 = 10$ , we obtain exactly the same figure with the only difference that it is rescaled  
221 (see Discussion and Figure S2). This figure now shows that even if most of the genome is  
222 neutral, tiny amounts of  $N_e$ -increasing selection strongly influence the IICR, as it always  
223 grows backward towards the plateau corresponding to the largest of the two  $\lambda_i$  values. It  
224 also shows that the recent IICR values can also be significantly greater than one, expected  
225 under neutrality.

226 Altogether Figures 1 and S2 suggest that there is a strong asymmetry between selection  
227 reducing (background and positive) or increasing (balancing)  $N_e$  in the genome in the way  
228 they affect IICR shapes. Balancing selection generates an ancient and high plateau at the  
229 level of  $\lambda_2$ , even for small proportions of  $a_2$  (Figure S2), whereas positive and background  
230 selection generate a recent and relatively more modest decrease of the IICR for small  
231 values of  $a_1$ , even assuming, as in Figure 1, that these generate a ten-fold decrease in  $N_e$   
232 (Figure 1).

### 233 **Extension to more classes**

234 While these observations are limited to the simplest case where there are only two  $\lambda_i$   
235 values, it is straightforward to show that they hold for any number of classes. Indeed, the  
236 starting value of the IICR in a model with  $K$   $\lambda_i$  values is

$$\text{IICR}(0) = \frac{1}{\sum_{i=1}^K a_i \mu_i} = \frac{1}{\sum_{i=1}^K \frac{a_i}{\lambda_i}} \quad (3)$$

237 and the limit value when  $t \rightarrow +\infty$  is equal to

$$\frac{1}{\mu_{i_0}} = \lambda_{i_0} = \max_{i=1 \dots K} (\lambda_i).$$

238 The initial value  $\text{IICR}(0)$  is thus necessarily between the smallest and largest  $\lambda_i$ , as it is  
239 the harmonic mean of the  $\lambda_i$ s weighted by their respective proportions  $a_i$ . The asymptotic  
240 value  $\text{IICR}(+\infty)$  will always be the largest  $\lambda_i$  found in the genome, *independent* of its  
241 proportion. In other words, even if a minute proportion of the genome is under balancing  
242 selection, under panmixia the IICR should necessarily plateau in the ancient past to a  
243 value corresponding to that  $\lambda_i$ . One intuitive explanation for the IICR growing (backward  
244 in time) towards the largest  $\lambda_i$  is that the genes that are characterized by a large  $N_e$

245 have much larger coalescence times than the rest of the genome. They thus contribute  
246 proportionately more to most ancient part of the IICR curve.

247 To further explore the influence of both types of selection (reducing and increasing  
248  $N_e$ ), we considered a model with 3 classes such that  $\lambda_1 < 1$ ,  $\lambda_2 = 1$  and  $\lambda_3 > 1$  (Figure 2).  
249 In this Figure we set the three  $\lambda_i$  as  $(\lambda_1, \lambda_2, \lambda_3) = (0.1, 1, 3)$ . As above,  $\lambda_1 < 1$  corresponds  
250 to genomic regions under linked positive or background selection,  $\lambda_2 = 1$  corresponds to  
251 the neutral part of the genome and  $\lambda_3 = 3$  to genomic regions under linked balancing  
252 selection. In the left panel, we considered a fixed small proportion of balancing selection  
253 ( $a_3 = 0.01$ ), and allowed the proportions of neutral and positive or background selection  
254 to vary ( $a_1$  varied from 0 to 0.8, and thus  $a_2$  from 0.99 to 0.19). In the right panel, we  
255 considered a fixed and large proportion of positive or background selection ( $a_1 = 0.5$ ) and  
256 varied the proportion of regions under balancing selection ( $a_3$  from 0 to  $10^{-1}$ ), and thus  
257 the proportion of neutral regions too ( $a_2$  between 0.5 and 0.4).

258 Figure 2 shows similarities with Figure 1. Specifically, both figures suggest that regions  
259 reducing  $N_e$  impact the IICR curves in the recent past whereas regions increasing  $N_e$   
260 impact the IICR in the ancient past. This is worth stressing given that our model assumes  
261 that  $N_e$  is reduced (in class 1) or increased (in class 3) in a stationary way throughout the  
262 genealogical history of the sampled genes. Also, small proportions of balancing selection  
263 seem to generate much bigger changes than small proportions of positive or background  
264 selection, as shown by the comparison of the IICRs obtained for  $a_1 = 0.01$  vs  $a_1 = 0$  on  
265 one hand (left panel) and for  $a_3 = 0.01$  vs  $a_3 = 0$  on the other hand (right panel).

266 There are however differences between Figure 2 and Figure 1. The simple fact that  
267 we consider both  $N_e$ -reducing and  $N_e$ -increasing forms of selection and thus variable  
268 proportions of neutral genomic regions generates complex IICR curves, in which both  
269 forms of selection directly or indirectly impact the whole IICR curves. When neutral

270 regions are frequent enough ( $a_1 \leq 0.5$  and  $a_3 \leq 0.01$ ), the IICR exhibits a plateau or a  
271 flattening at  $\lambda_2$  in its middle section, but for larger values of either  $a_1$  (left panel,  $a_1 = 0.8$ )  
272 or  $a_3$  (right panel,  $a_3 = 0.1$ ) the proportion of neutral genomic regions decreases and the  
273 IICR curve only exhibits a short inflexion corresponding to  $\lambda_2 = 1$  before increasing  
274 backwards towards  $\lambda_3$ . An interesting pattern related to this intermediate plateau is  
275 observed on the left panel when  $a_3$  is fixed: the IICR in the ancient past increases more  
276 and quicker (backward in time) for  $a_1 = 0.8$  than for lower values of  $a_1$ , although  $a_1$   
277 models the proportion of low  $N_e$  regions in the region. This counterintuitive result likely  
278 comes from the fact that the proportion of neutral regions decreases when  $a_1$  increases, so  
279 that the IICR directly increases to its highest possible value ( $\lambda_3 = 3$ ).

280 Despite this complex interplay, Figure 2 provides some insights about our capacity  
281 to detect or quantify either type of selection based on the IICR. The left panel suggests  
282 that the proportion of the genome under positive or background selection can be assessed  
283 from this curve: for large values of  $a_1$ , there is a quick decline of the IICR (forward in  
284 time) followed by a low plateau around  $\lambda_1$ , whereas lower  $a_1$  values see a more recent and  
285 gradual decrease of the IICR without any clear recent plateau. However, this distinction  
286 is far less visible when plotting on a natural scale (Figure S3), in which case  $a_1$  values as  
287 different as 0.1 and 0.5 lead to quite similar IICRs. Besides, results on the importance  
288 of  $a_1$  are likely exaggerated by the small value of  $\lambda_1$  used in Figure 2, which implies a  
289 10-fold reduction of  $N_e$ . In comparison, our choice of  $\lambda_3$  only implies a 3-fold increase of  
290  $N_e$  in Figure 2.

291 While the value of  $\lambda_3$  (more generally of the highest  $\lambda_i$ ) determines the plateau of the  
292 IICR, the proportion of this class ( $a_3$ ) appears to determine to a large extent the speed of  
293 convergence (backward) to this ancient plateau (right panel). For the smallest  $a_3$  values  
294 (0.1 or 0.01%), this ancient plateau is not reached within the figure (for  $t \leq 10$ ) whereas

295 a plateau corresponding to the neutral regions ( $\lambda_2 = 1$ ) is observed for quite long periods.  
296 For the largest  $a_3$  values considered here (1 or 10%), the convergence backward to the  
297 ancient plateau is so fast that the IICR does not exhibit the middle plateau around the  
298 neutral value, as already mentioned.

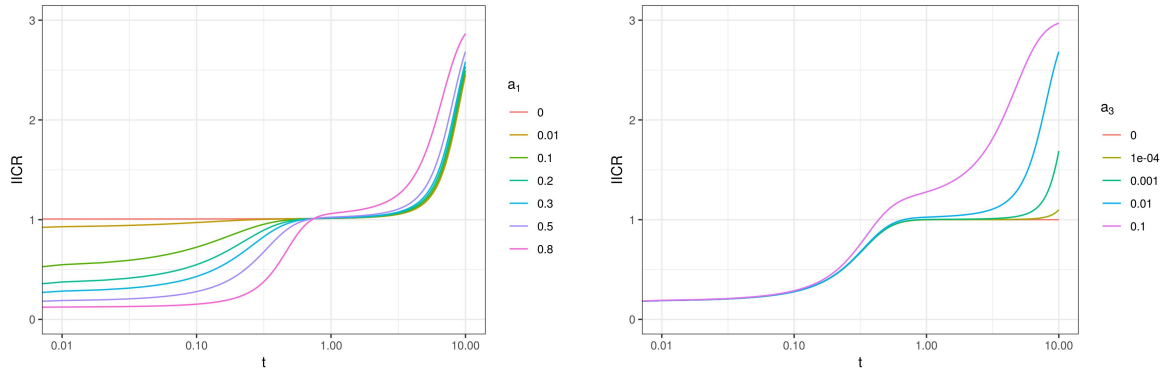

Figure 2: IICR for a panmictic model with  $K = 3$   $\lambda_i$  values such that  $\lambda_1 < 1$ ,  $\lambda_2 = 1$  and  $\lambda_3 > 1$ . The first class (or type) of genomic regions ( $\lambda_1 < 1$ ) is meant to represent regions of the genome under (linked) positive or purifying selection and is modelled by a constant population size  $\lambda_1 N$  with  $\lambda_1 = 0.1$ . Genomic regions of class 2 are meant to represent neutrality and they have a constant population size  $\lambda_2 N$  where  $\lambda_2 = 1$ . Regions of class 3 are meant to represent genomic regions under (linked) balancing selection, they have a constant population size  $\lambda_3 N$  with  $\lambda_3 = 3$ . Left panel: the frequency of class 3 is fixed at  $a_3 = 0.01$  and the frequencies of classes 1 and 2 are allowed to vary. The frequency  $a_1$  is given by the legend. Right panel: the frequency of class 1 is fixed at  $a_1 = 0.5$  and the frequency of classes 2 and 3 are allowed to vary. The frequency  $a_3$  is given by the legend.

299 While the value of  $\lambda_3$  (more generally of the highest  $\lambda_i$ ) determines the plateau of the  
300 IICR, the proportion of this class ( $a_3$ ) appears to determine to a large extent the speed of  
301 convergence (backward) to this ancient plateau (right panel). For the smallest  $a_3$  values



302 (0.1 or 0.01%), this ancient plateau is not reached within the figure (for  $t \leq 10$ ) whereas  
303 a plateau corresponding to the neutral regions ( $\lambda_2 = 1$ ) is observed for quite long periods.  
304 For the largest  $a_3$  values considered here (1 or 10%), the convergence backward to the  
305 ancient plateau is so fast that the IICR does not exhibit the middle plateau around the  
306 neutral value, as already mentioned.

307 In any case, these results suggest that if selection can be seen as reducing or increasing  
308  $N_e$  in a panmictic population, the strongest effect on the IICR seems to be dispropor-  
309 tionately the result of the largest  $N_e$ , even though it may in practice affect ancient parts  
310 of the IICR curves that may not be easily reconstructed from real data. PSMC curves  
311 obtained from real data show a sharp increase (backward in time) in the very ancient past  
312 in several species, including humans and Neanderthals. While this ancient increase is usu-  
313 ally ignored or interpreted as a statistical artefact resulting from the very low number of  
314 coalescence events dating back to this period, Figure 2 suggests that that it is possibly due  
315 to divergent alleles maintained by balancing selection. But it could also result from other  
316 factors of the ancient demographic history of species (Chikhi et al., 2018, Mazet et al.,  
317 2016). The interpretation of the IICRs represented in Figures 1 and 2 should indeed be  
318 done with caution given that the model used in the present section is panmictic whereas  
319 most species are likely to be structured. It is relevant to mention structure here because  
320 models of population structure also suggest a decrease of  $N_e$  (forward in time), visually  
321 similar to the model of selection considered here without structure. Models including both  
322 population structure and selection will be considered in a next section. Before coming  
323 to this we study a series of panmictic models inspired by research aiming at estimating  
324 variation in  $N_e$  in the genome of *Drosophila melanogaster* and *Homo sapiens*.

## 325 **Towards realistic distributions of $N_e$**

326 The above examples highlighted important and partly unexpected properties of the IICR  
327 when  $N_e$  is variable along the genome. However, they relied on arbitrary  $\lambda_i$  and  $a_i$  values.  
328 It is thus not clear to which extent they inform us on the impact of selection in real  
329 species. In this section we consider two model species for which variation in  $N_e$  has been  
330 documented or estimated, the fruit fly *Drosophila melanogaster* and humans (Figure 3).

331 In the case of *Drosophila melanogaster*, we compared two different distributions of  $\lambda_i$   
332 over the genome. The first one was taken from the study of Elyashiv et al. (2016), who  
333 developed a method for inferring the distribution of fitness effects in different classes of  
334 functional annotations (UTRs, codons . . . ) for both beneficial and deleterious mutations.  
335 This method requires polymorphism data from the focal species, divergence data with  
336 closely related species and precise recombination and annotation maps allowing to assess  
337 the selection constraints acting on each position in the genome. A by-product of their  
338 analysis is that an estimation of  $N_e$  can be obtained for sliding windows along the genome.  
339 Interestingly, these  $N_e$  values resulting from the strength of linked selection in each ge-  
340 nomic region are defined as the inverse of the coalescence rate between two sequences  
341 and all computations rely on heterozygosity values observed between pairs of individuals.  
342 This suggests that the  $N_e$  estimates should be directly comparable with our  $\lambda_i$  values,  
343 which also correspond to the inverse of pairwise coalescence rates. The values of  $N_e$  esti-  
344 mated by Elyashiv et al. (2016) for 1Mb sliding windows in *Drosophila melanogaster* were  
345 downloaded at <https://github.com/sellalab/LinkedSelectionMaps>. Their distribution (top  
346 left panel) was converted into a discrete distribution of  $\lambda_i$  values with  $K = 25$  classes  
347 using the *hist()* function of R. The IICR resulting from this distribution is shown in the  
348 top middle and right panels.

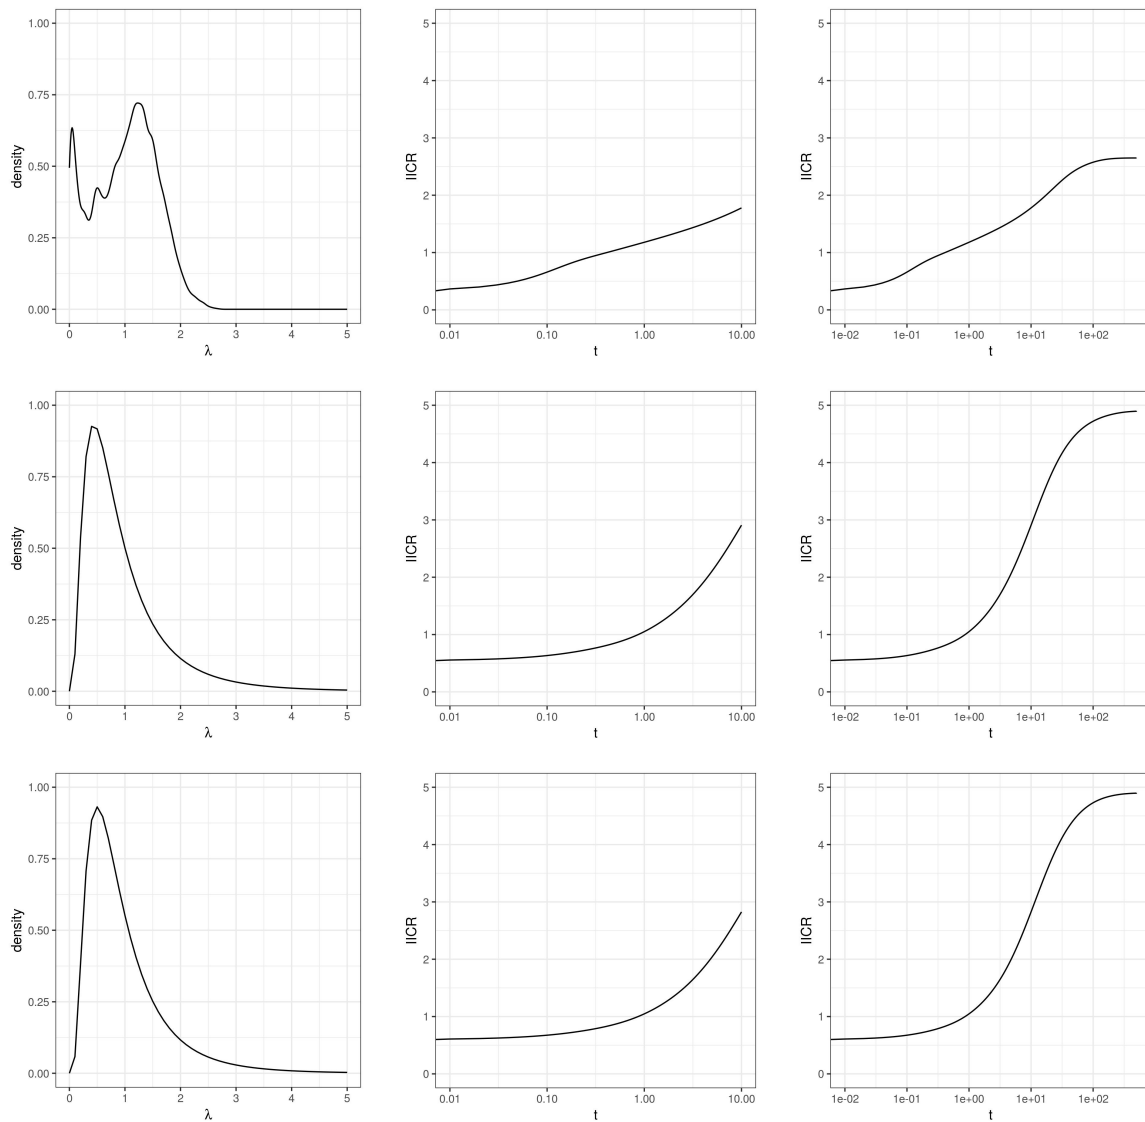

Figure 3: IICRs for panmictic models with large numbers of classes. This figure represents genome-wide distributions of  $\lambda_i$  (left panels) and the associated IICRs until  $t = 10$  (middle panels) or  $t = 500$  (right panels). Top panels: IICR for *Drosophila melanogaster* based on the  $N_e$  distribution estimated by Elyashiv et al. (2016). Middle panels: IICR for *D. melanogaster* based on the  $N_e$  distribution estimated by Gossmann et al. (2011) assuming a lognormal distribution. To make the two IICRs comparable, the distribution estimated by Elyashiv et al. (2016) (top left) was re-scaled to have an average of one, as assumed in the analysis of Gossmann et al. (2011) (middle left). Bottom panels: IICR for humans based on the  $N_e$  distribution estimated by Gossmann et al. (2011) assuming a lognormal distribution.

349 The second distribution used for this species was that estimated by Gossmann et al.  
350 (2011). While these authors also used polymorphism and divergence data, they focused on  
351 exons and did not aim at modelling the distribution of fitness effects. They assumed a log-  
352 normal distribution of  $N_e$  with mean value of 1 and estimated the scale parameter of this  
353 distribution from the observed data at several independent genes in the genome. Using the  
354 parameter obtained by this approach for *Drosophila melanogaster* and no recombination  
355 within genes (Table 1 of their study), we randomly sampled 100,000 values of  $N_e$  (or  $\lambda$ )  
356 under the log-normal distribution (middle left panel). A discrete distribution of the  $\lambda_i$ 's  
357 and the associated IICR were then computed as explained above, filtering out large  $\lambda$   
358 values (we arbitrarily excluded values above five). Indeed, it is not clear whether such  
359 large values would be realistic or statistical artifacts resulting from the use of a continuous  
360 distribution estimated mainly from smaller  $\lambda$  values. Also, they represent less than 0.6%  
361 of the distribution. As a comparison with another species, we also applied this second  
362 approach with the scale parameter inferred by Gossmann et al. (2011) for humans (bottom  
363 panels).

364 Figure 3 shows that, when focusing on times from 0 to 10 (middle column), the three  
365 IICRs produced by these analyses have similar shapes. The value of the IICR at  $t = 0$   
366 is close to 0.5 for the three distributions. Interestingly, the two most similar IICRs were  
367 those based on the log-normal distribution estimated by Gossmann et al. (2011), despite  
368 the fact they correspond to two rather different species (fruit fly and humans).

369 The IICR resulting from the distribution of Elyashiv et al. (2016) for *Drosophila*  
370 differs from the other two on two aspects. First, it has a lower value at  $t = 10$  (below  
371 two, whereas the others are close to three). One likely explanation is the smaller support  
372 of this distribution (up to  $\lambda_i = 2.5$ , versus  $\lambda_i = 5$  for the others), which implies a smaller  
373 plateau of the IICR as demonstrated in previous section. This effect becomes clear when

374 considering more ancient times (back to  $t = 500$ , right columns), but IICRs at such  
375 ancient times are unlikely to be observed from real data. Second, the IICR resulting from  
376 the distribution of Elyashiv et al. (2016) top middle panel) includes an inflexion between  
377  $t = 0.1$  and  $t = 1$ . This inflexion may be related to the mode observed for very low  
378  $\lambda_i$  values with this approach (which probably results from the inclusion of regions with  
379 very low recombination where the impact of linked selection is substantial) but not with  
380 the approach of Gossmann et al. (2011). Indeed, a similar (although more pronounced)  
381 inflexion was observed for models combining selection both reducing and increasing  $N_e$   
382 (Figure 2) but not for models with only one neutral and one selection class (Figure 1).  
383 Consistent with this hypothesis, filtering out  $\lambda$  values below 0.25 from the distribution of  
384 Elyashiv et al. (2016) lead to an IICR without inflexion (Figure S4).

385 Beyond these differences between the approaches of Gossmann et al. (2011) and  
386 Elyashiv et al. (2016), we note again that they resulted in rather similar IICRs, at least  
387 between  $t = 0$  and  $t = 10$ . The magnitude of the decrease observed in these IICRs was  
388 also comparable to that expected from Figure 2 for small values of  $a_1$  (e.g.  $a_1 = 0.1$ ,  
389 top right panel). Consequently, a long term 5 fold IICR decrease (from  $t = 10$  to  $t = 0$   
390 forward in time) could realistically be the result, in both humans and *Drosophila*, of a  
391 moderate proportion of loci with very small  $N_e$  (Figure 2,  $a_1 = 0.1$ , Figure 3, top) or from  
392 a larger proportion of loci with only slightly decreased  $N_e$  (Figure 3, middle and bottom),  
393 all as a consequence of linked selection.

## 394 **Generalisation to more complex models**

395 We can generalise equation (2) to more complex models by still assuming that the genome  
396 is divided into  $K$  groups of loci each characterized by a different coalescence rate history.

397 However, instead of describing this history by assuming panmixia and constant popula-  
398 tion size ( $\lambda_i N$ ), we can study different demographic models with departures from these  
399 assumptions, including models with population structure, models with panmixia and pop-  
400 ulation size changes, or models with transient changes in some of the  $\lambda_i$  values. In this  
401 more general framework, let us denote by  $f_i(t)$  the *pdf* of the  $T_2$  corresponding to the  
402  $i$ -th class. If we keep the assumption that we can obtain a sufficiently large and unbiased  
403 number of independent loci across the genome, and if we denote by  $a_i$  the proportion of  
404 the genome described by  $f_i$ , then the IICR is:

$$\text{IICR}(t) = \frac{\sum_{i=1}^K a_i R_i(t)}{\sum_{i=1}^K a_i f_i(t)}. \quad (4)$$

405 where  $f_i(t) = -R'_i(t)$ .

## 406 **Models with population structure: the n-island model**

407 One potential application of this general framework is to account for population structure  
408 when modelling each genomic class. To illustrate this idea, we first considered a model  
409 with  $K = 2$ ,  $\lambda_1 = 0.1$  and  $\lambda_2 = 1$  as in Figure 1. Here we assumed that these two classes  
410 evolved under a n-island model with the same number of demes ( $n = 10$ ), the difference  
411 in  $N_e$  being modelled through the use of different deme sizes in the two classes ( $\lambda_1 N$   
412 and  $\lambda_2 N$ ) We further assumed that selection did not affect migration, so that the *per*  
413 generation migration rate  $m$  was the same for the two classes. In other words, selection  
414 reducing  $N_e$  is assumed to operate after migration and thus only affects coalescence rates,  
415 but not migration rates, of the two genomic regions. This implies that the scaled migration  
416 rate  $M = 2Nm$  is identical in the two classes (time scale is still  $2N$  here, but  $\lambda_i N$  now  
417 refers to deme size rather than to the entire population size). One way of seeing this is

418 by considering that there are  $2N$  haploid genomes in each deme with scaled migration  
419 rate  $2Nm$  and that selection acts on the different genomic regions by changing drift by a  
420 factor  $\lambda_i$ .

421 As already mentioned and exploited in previous studies on the IICR (Grusea et al.,  
422 2018, Mazet et al., 2016, Rodríguez et al., 2018), the distribution of coalescence times un-  
423 der a symmetrical n-island model can be derived analytically (Herbots, 1994). Extending  
424 these derivations to a model with general deme size  $\lambda_i N$ , instead of  $N$  in previous studies,  
425 we can show (see Appendix) that in this case we have

$$f_i(t) = p_i e^{-\alpha_i t} + \left(\frac{1}{\lambda_i} - p_i\right) e^{-\beta_i t} \quad (5)$$

426 with

$$\alpha_i = \frac{1}{2} \left( \frac{1}{\lambda_i} + n\gamma + \sqrt{\left(\frac{1}{\lambda_i} + n\gamma\right)^2 - \frac{4}{\lambda_i}\gamma} \right),$$

$$\beta_i = \frac{1}{2} \left( \frac{1}{\lambda_i} + n\gamma - \sqrt{\left(\frac{1}{\lambda_i} + n\gamma\right)^2 - \frac{4}{\lambda_i}\gamma} \right),$$

$$\gamma = \frac{M}{n-1}$$

427 and

$$p_i = \frac{\gamma - \alpha_i}{\lambda_i(\beta_i - \alpha_i)}.$$

428 By setting  $\lambda_i = 1$  for all  $i$  we have the results of Mazet et al. (2016). The IICR of an  
429 n-island model with two classes of deme size can be obtained by computing  $f_i(t)$  with  
430 each  $\lambda_i$  using Equation (5) and inserting the results into Equation (4).

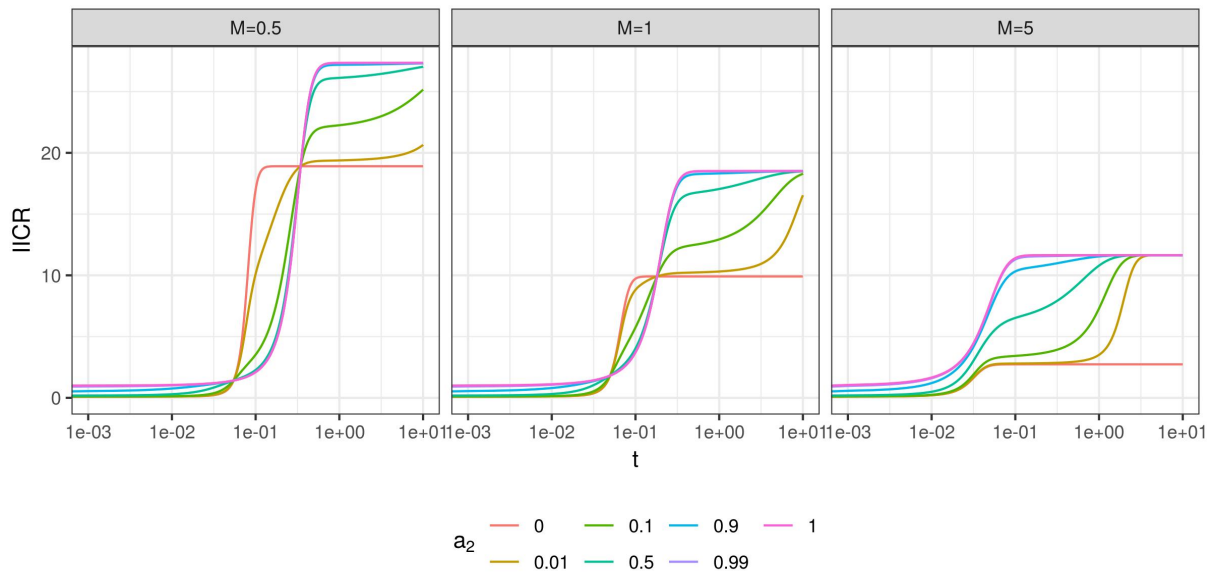

Figure 4: IICR curves for a symmetrical  $n$ -island model with  $n = 10$  demes and  $K = 2$  classes of genomic regions. Regions of class 1 and 2 have a constant deme size  $2N\lambda_1$  and  $2N\lambda_2$  with  $\lambda_1 = 0.1$  and  $\lambda_2 = 1$ . Scaled migration rate  $M = 4Nm$  is the same for the two classes, each panel corresponding to a different value of this parameter. Frequencies  $a_1$  and  $a_2$  of the 2 classes are given by the legend (having in mind that  $a_1 + a_2 = 1$ ). For comparison with panmictic models (in particular those in Figure 1), time is scaled by the meta-population size  $2Nn$  rather than by the deme size  $2N$  as in Equation (5).

431 IICR curves obtained for this two class  $n$ -island model are shown in Figure 4 for  
 432 different values of the scaled migration rate. For  $M = 5$ , they are similar to those shown  
 433 in Figure 1. This was expected given that an  $n$ -island model with high migration ( $M \gg 1$ )  
 434 should behave in a way that is similar to a panmictic model with population size  $2Nn$ ,  
 435 except in the recent past where the IICR of the  $n$ -island still reflects local deme size  
 436 (Mazet et al., 2016). For lower migration rates, the two extreme models with  $a_2 = 0$



437 (red curve) or  $a_2 = 1$  (violet) show that a higher plateau of the IICR is observed as  $M$   
438 decreases, which was again expected (Mazet et al., 2016).

439 For lower migration rates ( $M \leq 1$  in Figure 4), models with rather large values of  $a_1$   
440 are hard to distinguish from the model with  $a_1=0$  (no selection). For instance, the IICR  
441 with  $a_2 = a_1 = 0.5$  is not very different from that with  $a_2 = 1$ , in contrast to Figure 1  
442 where panmixia was assumed. This suggests that population structure may tend to mask  
443 the effect of positive or negative selection as long as a moderate part of the genome is  
444 under selection. On the other hand, the IICR with  $a_2 = 0.01$  is more similar to that with  
445  $a_2 = 0$  than under panmixia. This suggests that, in the presence of population structure,  
446 models with pervasive selection (99% of the genome with  $\lambda = 0.1$ ) may be interpreted as  
447 neutral models with small effective size (100% of the genome with  $\lambda = 0.1$ ).

448 Another interesting observation from Figure 4 is the existence of a time window where  
449 the IICR is lower when  $a_2$ , corresponding to the largest  $N_e$ , is largest, *i.e.* the IICR  
450 is lower for models with a smaller part of their genome under selection reducing  $N_e$ .  
451 This time window occurs in the recent past and is wider for lower migration rates. This  
452 counter-intuitive result illustrates the limits of interpreting the IICR as a trajectory of  
453 effective size, as already outlined for several other demographic scenarios (Chikhi et al.,  
454 2018, Mazet et al., 2016). Outside this period, the IICR curves seem to always reach  
455 higher values when  $a_2$  is larger. This is in particular the case for  $t$  close to 0, which is  
456 expected analytically (Equation (3)).

457 To check whether these conclusions may still hold for more realistic demographic sce-  
458 narios, we next assume that each genomic class evolves under the non stationary n-island  
459 model estimated by Arredondo et al. (2021) to fit the observed PSMC of a modern human  
460 from Karitiana (Li and Durbin, 2011). This model includes 11 islands with symmetric  
461 migration and (diploid) deme size 1,380 and it assumes that these islands go through 4

462 changes of connectivity in the past:  $M \approx 0.9$  ( $m \approx 1.6e - 4$ ) from present to 24,437  
463 generations before present (BP),  $M \approx 17.7$  ( $m \approx 3.2e - 3$ ) from 24,437 to 82,969 gen-  
464 erations BP,  $M \approx 2.5$  ( $m \approx 4.5e - 4$ ) from 82,969 to 107,338 generations BP,  $M \approx 0.7$   
465 ( $m \approx 1.3e - 4$ ) from 107,338 to 179,666 generations BP and  $M \approx 1.1$  ( $m \approx 2e - 4$ ) in  
466 more ancient times. We define  $K$  classes of genomic regions: one neutral region with  
467 deme size  $N$  and  $K - 1$  other regions under selection with deme size  $\lambda_i N$ , for  $\lambda_i$  either  
468 smaller or larger than 1. Two different options are considered to model the heterogeneity  
469 of effective size along the genome: (i) the hypothetical three class model of Figure 2 with  
470 one class corresponding to positive or negative selection and one other corresponding to  
471 balancing selection (top panels), and (ii) the 25 class model of Figure 3 estimated from  
472 Gossmann et al. (2011)'s analysis of human real data (bottom panel).

473 We find that large values of  $a_1$  could have a significant impact on the IICR in the  
474 period ranging from 10,000 to 30,000 generations ago (corresponding to 200-300,000 to  
475 600-900,000 years ago). For instance with  $a_1 = 0.8$ , the IICR is around 17 in the most  
476 recent hump and around 5 in the most recent bump, versus 22 and 12 without selection  
477 (top left panel). However, this effect is very moderate when considering the  $\lambda_i$  distribu-  
478 tion estimated by Gossmann et al. (2011) (bottom panel). Much more dramatic is the  
479 effect observed in the ancient past above 100,000 generations ( $\approx$  2-3 million years) before  
480 present, where the IICR with selection is significantly larger than the neutral IICR. This  
481 difference is driven by the part of the genome with large effective size (i.e. under balancing  
482 selection) and is found (with varying magnitude) in all scenarios.

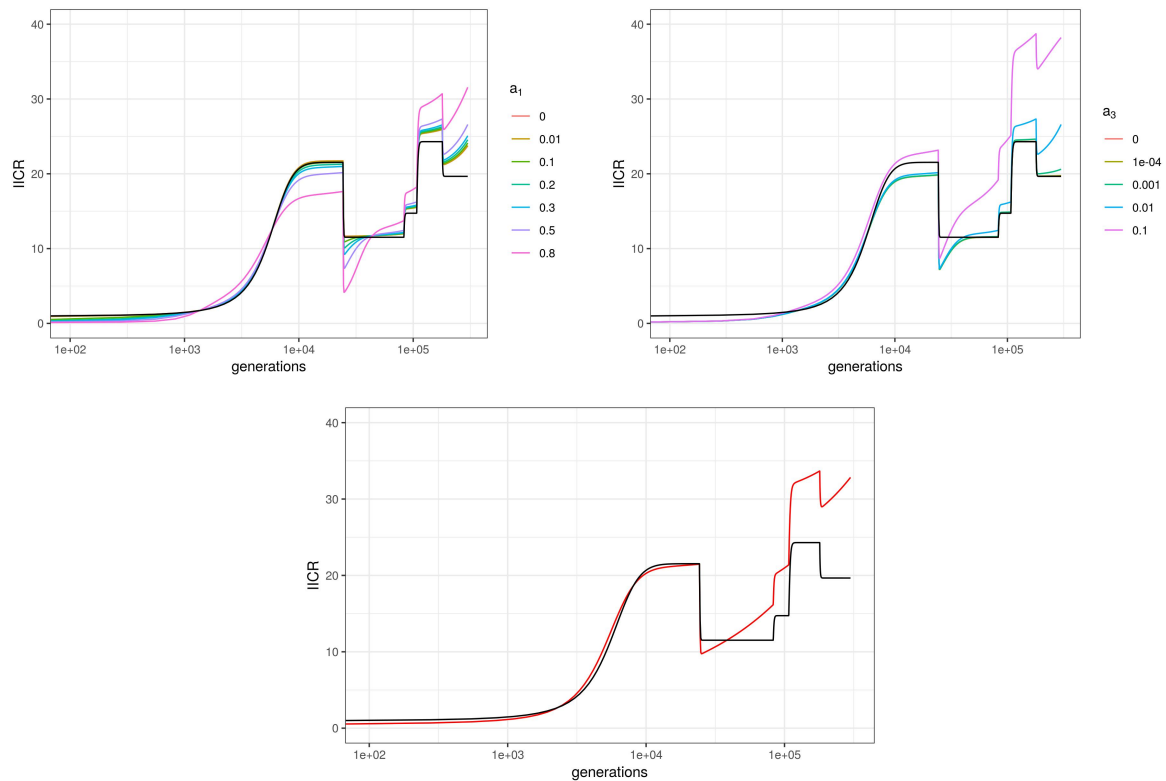

Figure 5: IICRs for demographic models combining population structure and linked selection in humans. The neutral part of the genome evolves under the non stationary n-island model estimated by Arredondo et al. (2021) to fit the observed PSMC of a modern human from Karitiana (Li and Durbin, 2011) **Good ref?**. This model includes 11 islands with (diploid) deme size  $N = 1380$ , whose connectivity varied along time according to a 3 step process (see the text for details). To account for selection, this neutral class only represents a fraction of the genome and other classes with lower or higher  $N_e$  are also considered. The number of these classes, their proportions and deme sizes (relative to the neutral class) are taken either from Figure 2 (top, where  $a_3$  is fixed to 0.01 in the left panel, and  $a_1$  fixed to 0.5 in the right one) or from Figure 3 (bottom, red line). The black curve on all panels depicts the IICR for this demographic scenario but without selection. Time is shown in generations and in log10 scale.

## 483 Panmictic models with transient selection

484 We finally apply this general framework to model the transient effect of recent selec-  
485 tive sweeps, rather than the effect of recurrent positive, negative or balancing selection  
486 considered until now. For this analysis we consider a panmictic population. A similar  
487 question was tackled by Schrider et al. (2016), who showed in their Figure 5 the esti-  
488 mations obtained when applying the PSMC to a 15Mb genomic region that experienced  
489 one or several recent selective sweeps. We focus here on a scenario similar to theirs, with  
490 one single selective sweep and propose a model with different classes of  $\lambda_i$  that are time-  
491 dependent, which allows to approximate the resulting IICR. Although this model is built  
492 based on the expected variations of effective size (or coalescence rate) in a 15Mb region,  
493 we note that it also applies to a whole genome having experienced on average one recent  
494 selective sweep per 15 Mb region. In other words, our aim here is not to switch from  
495 the analysis of global to local IICRs, but rather to explore the local and implicitly global  
496 effects in a relatively realistic example.

497 To approximate the IICR resulting from a recent selective sweep, we assume that the  
498 effect of this sweep can be modelled by a reduction of effective population size that is  
499 limited both in time (from the emergence of the derived favorable allele to its eventual  
500 fixation in the population) and in "genomic space" (*i.e.* in a genomic neighborhood of  
501 this selected variant). More precisely, we consider that the region affected by the sweep  
502 on one side of the selected locus is of size

$$L = -\log(0.05) \frac{\alpha}{8Nr \log(\alpha)}$$

503 with  $N$  the diploid population size,  $r$  the per site recombination rate and  $\alpha = 2Ns$   
504 the scaled selection intensity ( $s$  being the fitness advantage of homozygotes carrying the

505 selected mutation). This quantity corresponds to the distance in base pairs (bp) from  
506 the selected site such that heterozygosity is reduced by only 5% at the end of the sweep  
507 (Walsh and Lynch, 2018, chap. 8). To capture the fact that the reduction of effective  
508 size caused by the sweep depends on the physical distance to the selected site, we divide  
509 this affected region in 10 classes of same size  $2\frac{L}{10}$  with increasing distance from the sweep,  
510 where the factor two results from the sweep extending on both sides of the selected site.

511 To quantify the reduction of effective size in a given class, we consider the genealogy  
512 at a neutral locus located  $d$  bp away from the selected site. This process can be modelled  
513 using a structured coalescent where lineages are either in the 'derived' or 'ancestral' back-  
514 ground, depending on which allele at the selected locus they are associated with (to avoid  
515 any confusion, we remind here that this structure is a modelling facility and has nothing to  
516 do with the island structure considered in previous section. In this framework, ancestral  
517 recombination events creating or breaking the association with the derived allele can be  
518 seen as migration events from one background to the other (Kaplan et al., 1988). In the  
519 case of a complete selective sweep, lineages sampled at present all belong to the derived  
520 background, because the derived allele is then fixed in the population. Following previous  
521 studies on this topic, e.g. (Nielsen et al., 2005), we further assume a "star-like" model  
522 where these lineages can either (i) escape this derived background through recombination  
523 and stay in the ancestral background until the end of the sweep phase (i.e. at the time  
524 when the derived allele appeared, as we go backward in time) or (ii) coalesce all together  
525 at the end of the sweep phase. Actually, we slightly relax this second hypothesis and  
526 simply assume that their average coalescence time corresponds to the end of the sweep  
527 phase. The probability for each lineage to escape the sweep is approximately

$$q = 1 - e^{-4drN \log(\alpha)/\alpha}$$

528 Because lineages can only coalesce if they are in the same background (derived with prob-  
529 ability  $(1 - q)^2$  or ancestral with probability  $q^2$ ), we assume that the average coalescence  
530 rate during the sweep is

$$\mu_{sweep} = (1 - q)^2 \frac{1}{\tau} + q^2 \frac{1}{2N}$$

531 where

$$\tau = 8N \log(\alpha) / \alpha$$

532 is the duration of the sweep (in generations). In this formula,  $\frac{1}{\tau}$  approximates the average  
533 coalescence rate for two lineages not escaping the sweep, which follows from our assump-  
534 tion that the average coalescence time is  $\tau$ , and  $\frac{1}{2N}$  is the standard neutral coalescence  
535 rate which applies to two lineages having escaped the sweep.

536 In summary, the relative effective population size in a given genomic class affected by  
537 the sweep is equal to 1 before and after the sweep and to

$$\lambda_{sweep} = \frac{1/\mu_{sweep}}{2N}$$

538 during the  $\tau$  generations of the sweep. A neutral class (with  $\lambda = 1$  at all times) is also  
539 included to account for positions within the 15Mb segment but with physical distance to  
540 the selected site greater than  $L$ .

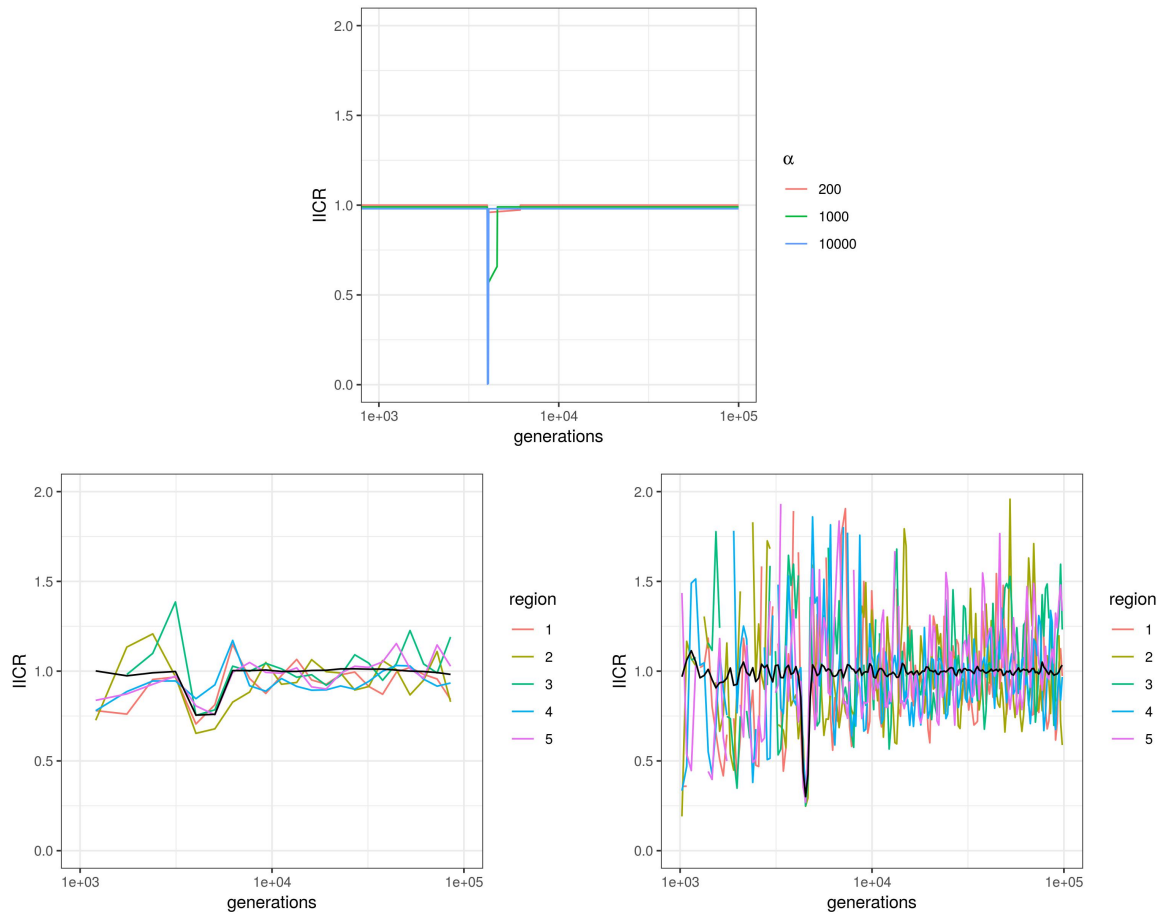

Figure 6: IICRs for a 15Mb region experiencing a single recent selective sweep. Parameter values were chosen to reproduce those in Figure 5 of Schrider et al. (2016):  $N = 10000$  (diploid size),  $r = 10^{-8}$  (per site recombination rate) and  $t_0 = 4000$  generations before present (time where the derived allele got fixed). Times are given in generations and are shown in log10 scale. Top: Expected IICRs when modelling selection using a panmictic model with  $K = 11$  classes of regions. Class 11 represents the neutral part of the region (unaffected by the sweep), with relative population size  $\lambda_{11} = 1$ . Class  $j$  ( $1 \leq j \leq 10$ ) represents a part of the region affected by the sweep, with a given physical distance from the selected site (which increases with  $j$ ). Relative population size is equal to  $\lambda_j = 1$  before and after the sweep and is decreased during the sweep to match the larger coalescence rate (see the text for more details). The proportion of each selected class  $j \geq 10$  is  $L/5$ , where  $L$  is the size of the region affected by the sweep on either side of the selected site. Scaled selection intensity  $\alpha = 2Ns$  was equal to 200, 1000 or 10000 (see the legend). Bottom: Empirical IICRs based on coalescence times simulated with the software *msms*, for  $\alpha = 1000$ . Two hundreds independent 15Mb regions were simulated. Colored lines show the IICRs for 5 of these regions (taken at random) and thus represent typical local IICRs. Black lines show the IICRs obtained when merging coalescence times from all regions, they thus correspond to genome-wide IICRs obtained for a 3Gb genome ( $200 \times 15\text{Mb}$ ) with one selective sweep every 15Mb. The number of time windows considered (i.e. of distinct estimated IICR values) was equal to 25 (left) or 200 (right) and the length of these windows was increasing exponentially backward in time, as in the PSMC approach.

541 As shown in Figure 6, top panel, the resulting IICR for  $\alpha = 200$  (corresponding to  
542  $s = 0.01$  for  $N = 10,000$ ) is very close to that of a neutral scenario. The IICR for  
543  $\alpha = 1000$  (corresponding to  $s = 0.05$  for  $N = 10,000$ ) shows a reduction of about one half  
544 at sweep time, similar to the average PSMC plot in Figure 6B of Schrider et al. (2016).  
545 The IICR for  $\alpha = 10000$  (corresponding to  $s = 0.5$  for  $N = 10,000$  or to  $s = 0.05$  for  
546  $N = 100,000$ ) shows a much stronger decline, down to almost zero. However, the IICR  
547 decline in our analysis is very localized in time, while the PSMC decline in (Schrider et al.,  
548 2016) extends for a longer period. Another important difference is that the PSMC plot  
549 in the simulations of Schrider et al. (2016) not only recovers the neutral value after the  
550 sweep but increases up to more than twice this value in the recent past. To understand  
551 these differences, we simulated coalescence times along a 15Mb region under the same  
552 sweep scenario, with  $\alpha = 1000$ , using the software *msms* (Ewing and Hermisson, 2010)  
553 and estimated the resulting empirical IICR as in Chikhi et al. (2018).

554 Similar to PSMC estimations, these empirical IICR estimations depend on the number  
555 of time windows considered, the assumption being that  $N_e$  is constant within each time  
556 window but may vary between time windows. In the bottom left panel of Figure 6, we  
557 consider 25 time windows, which corresponds to the order of magnitude used in most  
558 PSMC studies. The resulting IICR, averaged over 200 replicates, is transiently reduced  
559 around the sweep time and shows no increase above 1 in the recent past, similar to our  
560 theoretical prediction (top panel). However, the reduction of  $N_e$  is both longer and of  
561 lower magnitude than in our prediction, as in the PSMC plots of Schrider et al. (2016).  
562 In the bottom right panel, we consider 200 time windows and obtain an average IICR  
563 in which the magnitude and duration of the decrease is much more consistent with our  
564 theoretical prediction. IICRs from single replicates also correctly capture this reduction  
565 around the sweep time but are very noisy outside this period as a side effect of the



566 finer time discretization. Altogether, these results show that modelling selective sweeps  
567 by local transient changes of population size leads to a reasonable approximation of the  
568 IICR (or equivalently of the genome-wide distribution of  $T_2$ ) but that discretizing time  
569 using a limited number of time windows may lead to soften the true sweep signature by  
570 an averaging effect. The IICR increase following the sweep observed with the PSMC plots  
571 produced by Schrider et al. (2016) but not in our results (even when simulating sweeps)  
572 also outlines that the genome-wide distribution of  $T_2$  may not be sufficient to characterize  
573 the genomic patterns left by selective sweeps in the data (some of them being exploited  
574 by PSMC). We come back to this point in the Discussion section.

## 575 Discussion

### 576 Effects of linked selection on the IICR

577 A now classical hypothesis in population genetics considers that linked selection can be  
578 modelled as a first approximation by a local change in effective population size (Hill  
579 and Robertson, 1966). Background selection and selective sweeps, which tend to reduce  
580 genetic diversity locally Charlesworth et al. (1993), Smith and Haigh (1974), are then seen  
581 as resulting in lower  $N_e$  values, whereas genomic regions under balancing selection are in  
582 contrast interpreted in terms of higher  $N_e$  values. In both cases, the impact of selection on  
583 genetic diversity or  $N_e$  is stronger for regions with lower recombination or higher selective  
584 constraints (number of selected sites, selection intensity) Charlesworth (2009). At the  
585 genome-wide level, linked selection appears thus to generate an apparent heterogeneity of  
586  $N_e$  among genomic regions, reflecting the variations of the mode (increasing or decreasing  
587  $N_e$ ) and the intensity of linked selection (Gossmann et al., 2011, Jiménez-Mena et al.,  
588 2016a). Following this simplifying assumption, we described in this study the distribution

589 of the coalescence time between two sequences ( $T_2$ ) for models including variable classes  
590 of  $N_e$  along the genome. More precisely, we characterized the Inverse Instantaneous  
591 Coalescence Rate (IICR) (Mazet et al., 2016) of such models, a quantity that is equivalent  
592 to the  $T_2$  distribution and corresponds to the output of the popular PSMC approach (Li  
593 and Durbin, 2011), which is generally (and in some cases at least wrongly) interpreted  
594 as the past temporal trajectory of  $N_e$  of the population or species under study. This  
595 analysis allowed us to predict the expected effects of linked selection on PSMC or related  
596 demographic inference approaches Schiffels and Durbin (2013).

597 One of the main conclusions of our work is that, under panmixia and constant popula-  
598 tion size, the existence of several classes of  $N_e$  (induced by linked selection) *always* results  
599 in a spurious signal of population size decline: the IICR of such models is a decreasing  
600 function (forward in time) whose highest value (reached in the ancient past) corresponds  
601 to the largest genomic  $N_e$  and lowest value (reached in the most recent past) to the har-  
602 monic mean of genomic  $N_e$  values weighted by their relative proportion in the genome  
603 (Figure 1, Equation 3). Specifically, we found that selection reducing  $N_e$  (background  
604 selection or sweeps) has a stronger effect on the IICR in the recent past, while selection  
605 increasing  $N_e$  (balancing selection) mainly influences the IICR in the intermediate and  
606 ancient past (Figure 2). There is a striking asymmetry between the two forms of selection:  
607 because the IICR plateau is determined by the class with the largest  $N_e$  independently  
608 of the proportion of this class, even a minute proportion of balancing selection can have  
609 a large effect on the IICR, whereas higher proportions of background selection or sweeps  
610 are necessary to generate significant and detectable effects on the IICR (Figure 2). Com-  
611 bining the two forms of selection by considering  $N_e$  distributions inferred from real data  
612 (Elyashiv et al., 2016, Gossmann et al., 2011) we found that linked selection is expected  
613 to cause a long term apparent five-fold decrease of the IICR in organisms such as humans

614 or *Drosophila melanogaster* (Figure 3). However, we stress that these results assumed  
615 panmixia and constant population size.

616 Another important conclusion of our work is indeed that the effects of linked selection  
617 on the IICR mentioned above may be largely hidden by those of population structure.  
618 Considering a symmetrical  $n$ -island model, we observed for instance that even when a  
619 large proportion of the genome is influenced by selection reducing  $N_e$  the effect on the  
620 IICR could be difficult to see for models with reduced migration rates between islands  
621 (Figure 4). Focusing on humans we also considered a simple but reasonable demographic  
622 scenario of variable population structure Arredondo et al. (2021) together with a realistic  
623 genomic  $N_e$  distribution for this species Gossmann et al. (2011). We found that the  
624 largest and most visible effect of linked selection on the IICR was an ancient population  
625 size increase (backward in time) related to the presence of balancing selection (Figure 5,  
626 bottom).

627 The predominant influence of balancing selection outlined by our results may need to  
628 be toned down in more practical or realistic settings. Depending on the proportion of the  
629 genome under balancing selection, this effect may or may not be visible on real PSMC  
630 plots. For instance in humans, estimated PSMC plots extend to a few million years before  
631 present. Under the common assumptions of a diploid effective population size of 10,000  
632 (under panmixia) and a generation time of about 20-30 years, one million years would  
633 correspond to a scaled time of five. Thus, human PSMC curves would fit within the  
634 panels represented in Figure 2, but the effect of balancing selection would not be easily  
635 detectable if  $a_3 \leq 0.01$ . For  $a_3 \geq 0.01$ , it might only be detected as a rapid backward  
636 increase in the most ancient parts of the PSMC curves, as also suggested when considering  
637 more realistic demographic and selection models (Figure 5). Such ancient increases are  
638 indeed observed in humans and a number of other species, but a further complication

639 is that these patterns may also arise due to the low number of informative coalescence  
640 events available to PSMC in this ancient time period. PSMC analyses of genomic data  
641 simulated under realistic demographic scenarios, with and without balancing selection,  
642 will be necessary to investigate whether these ancient signatures of balancing selection  
643 can be disentangled from statistical artifacts. As a simple test we carried out additional  
644 simulations under an n-island model, generating genomic data under the demographic  
645 model of Figure 5 with a single genomic  $N_e$  (i.e. no selection). We applied PSMC to  
646 these data and found no ancient increase in the estimated trajectory compared to the  
647 expected IICR (Figure S5). These admittedly limited results suggest that the PSMC is  
648 not necessarily *statistically* biased in the ancient past, and that the signals observed in  
649 several species including humans and chimpanzees might be due to balancing selection or  
650 other forms of selection maintaining high levels of diversity over very long periods. One  
651 possible strategy to limit the influence of regions submitted to such forms of selection  
652 would be to first detect them and filter them out from the PSMC analysis. For the  
653 demographic scenario of Figure 5, we found that this would reduce the biases observed in  
654 the ancient past without affecting significantly other parts of the IICR (Figure S6).

## 655 **The intriguing signature of background selection on the IICR**

656 The framework developed in this study makes no particular distinction between positive  
657 and background selection, which are both modelled as leading to a reduction of  $N_e$ . Thus,  
658 one possible interpretation of our results would be that unaccounted background selec-  
659 tion leads to a spurious signal of population decline. This conclusion is at odds with  
660 several previous studies, which concluded that unaccounted background selection may  
661 actually lead to a spurious signature of recent population expansion. For instance, Zeng  
662 and Charlesworth (2011) and Walczak et al. (2012) developed theoretical approximations

663 of the genealogical process at a neutral locus linked to a site under negative selection and  
664 showed that this process shared many properties with that of an expanding population.  
665 The former study accounted for intra-locus recombination, whereas the latter ignored it.  
666 Several recent studies have applied demographic inference methods to genomic data simu-  
667 lated with and without linked background selection (Ewing and Jensen, 2016, Johri et al.,  
668 2021, Lapierre et al., 2016, Pouyet et al., 2018) and observed a signal of recent popula-  
669 tion expansion in the scenarios including selection. Finally, Johri et al. (2020) analyzed  
670 real data from an African population of *Drosophila melanogaster* with a new ABC demo-  
671 graphic inference approach accounting for background selection. They estimated that the  
672 size of this population has been relatively constant for a few millions generations, while  
673 several previous studies on this or other related populations, which ignored background  
674 selection, estimated a strong recent population size increase.

675 Two main reasons may resolve this apparent paradox between these previous results  
676 and ours. First, we assume that linked selection can be modelled by a local change of  
677  $N_e$  without any temporal dynamics (except in Figure 6 and related text), whose focus is  
678 specifically on recent selective sweeps). In particular, our results do not hold for demo-  
679 graphic inference approaches based on the Site Frequency Spectrum (SFS), because weak  
680 background selection is expected to produce an excess of low frequency alleles, in partic-  
681 ular singletons, which cannot be mimicked by just assuming a smaller  $N_e$ . Such an excess  
682 of rare alleles is also a classical signature of expanding populations, which may explain  
683 the conclusions of several of the studies mentioned above (Ewing and Jensen, 2016, Johri  
684 et al., 2020, Lapierre et al., 2016, Pouyet et al., 2018).

685 Second, even when focusing on pairwise statistics such as heterozygosity or  $T_2$ , the  
686 signature of population decline predicted by the IICR can only be observed if the data  
687 considered exhibit some heterogeneity in  $N_e$ . As it can easily be seen from Figure 1,

688 panmictic models with either no ( $a_2 = 1$ ) or only ( $a_2 = 0$ ) selection do not show declining  
689 but constant IICRs. Consequently, a decline signature is not necessarily expected when  
690 analyzing a single locus under selection as in Zeng and Charlesworth (2011) or Walczak  
691 et al. (2012). It is also not necessarily expected when analyzing genome-wide data with  
692 homogeneous selective constraints along the genome. For instance, Johri et al. (2021)  
693 simulated genome-wide sequences including background selection by considering a regular  
694 alternance of functional (selected) and intergenic (neutral) regions of fixed and relatively  
695 small sizes: depending on the scenario, the size of a single 'unit' including one functional  
696 and one intergenic region ranged from  $\approx 13$  to 55 kb. The PSMC analyses of these  
697 sequences suggested a population under constant size or slight recent expansion. We  
698 believe that some of the results obtained by these (and possibly other) authors could  
699 be due to the fact that the data simulated with this approach do not exhibit enough  
700 heterogeneity in population sizes among (short) sliding windows over the genome. Such a  
701 regularity is at odds with observations made in different organisms (Elyashiv et al., 2016,  
702 Gossmann et al., 2011).

## 703 **IICR predictions and PSMC estimations**

704 Understanding the difference between our results and those of Johri et al. (2021) also leads  
705 to the fundamental question of the link between a PSMC curve and the IICR. As outlined  
706 in Mazet et al. (2016) and several subsequent studies, the IICR is a theoretical function  
707 associated to a given evolutionary model (and sampling scheme), while the PSMC is an  
708 estimation of this theoretical quantity. When population size history is homogeneous  
709 along the genome (i.e.  $K = 1$  class), PSMC provides a very good estimation of the IICR  
710 (Mazet et al., 2016). But when population size history is heterogeneous along the genome,  
711 as considered here to approximate the effects of selection, the answer may depend on the

712 scale (10kb? 100kb? 1Mb?) at which this heterogeneity is detectable. In other words, for  
713 a fixed proportion of genomic positions with reduced effective size due to linked selection,  
714 PSMC results may depend on the spatial clustering of these positions along the genome,  
715 while the IICR does not.

716 To explore this question, we tested whether genomic data including genome-wide het-  
717 erogeneity of  $N_e$  at different scales could generate PSMC plots consistent with our IICR  
718 predictions. To do this we carried out a limited number of additional simulations in which,  
719 using the genomic sizes  $\lambda_1 = 1$  and  $\lambda_2 = 10$ , we varied the lengths  $L_1$  and  $L_2$  of con-  
720 tiguous DNA chunks belonging to a given class, while keeping constant the proportions  
721  $a_1$  and  $a_2 = 1 - a_1$  at which these classes are represented. We tested three values for  
722 the frequency  $a_1$  (0.5, 0.9 and 0.99), and for each combination of these parameters we  
723 simulated two independent genomes of length  $10^9$  base pairs, where the two size classes  
724 were evenly spaced in the form:

$$(L_1, L_2, L_1, L_2, \dots, L_1, L_2).$$

725 The lengths  $L_2$  for the chunks of class 2 were chosen to be  $10^6$ ,  $10^5$  and  $10^4$  base pairs,  
726 and the lengths for the chunks of class 1 follow from the proportions  $a_1$  and  $a_2$ . We found  
727 that PSMC estimations fit well our predictions for large chunks ( $10^6$  and  $10^5$ ), but may  
728 highlight more complex and unpredicted patterns for smaller ones (Figure S7). This may  
729 explain the poor fit of our predictions with the PSMC results of Johri et al. (2021), where  
730 the heterogeneity of  $N_e$  was detectable only at very small scale ( $\leq 55\text{kb}$ ).

731 The recent selective sweep scenario considered in Figure 6 also nicely illustrates the  
732 potential difference between PSMC estimations and IICR predictions in the case of ge-  
733 nomic heterogeneity. Simulating *genome sequences* in a single 15Mb region experiencing

734 one recent selective sweep, Schrider et al. (2016) found that PSMC applied to these se-  
735 quences would infer a bottleneck around the time of the sweep completion, generally  
736 followed by a more recent expansion exceeding the 'neutral' effective size. Simulating  
737 *coalescence times* under the same selective sweep scenario and estimating the IICR from  
738 these simulated values, we observed a similar bottleneck but no recent expansion. This  
739 difference likely results from the fact that short coalescence times are mostly clustered  
740 around the selected site in the real data, while for IICR estimation only their proportion  
741 over the 15Mb region matters. Including a transient change of  $N_e$  into our model with  
742 heterogeneous effective size along the genome, we can reproduce the main characteristics  
743 of the IICR with selection, but not completely of the PSMC with selection.

744 Overall, the results discussed in this section suggest that, although our study allows to  
745 describe the expected effects of linked selection on the overall distribution of coalescence  
746 times, specific simulations based on precise genomic annotations (positions and lengths  
747 of genes, local recombination rates ...) may be necessary to really assess potential PSMC  
748 biases in a given species.

## 749 **Perspectives**

750 The above discussion illustrates that the effects of linked selection on demographic in-  
751 ference are complex, as they not only depend on the type and intensity of selection but  
752 also on the inference approach applied and how data are summarized (SFS or  $T_2$  based  
753 for instance) or the scale at which selection constraints vary along the genome. If the  
754 future confirms that linked selection is pervasive in the genome as claimed for several  
755 model species (Elyashiv et al., 2016, Pouyet et al., 2018) new demographic inference ap-  
756 proaches accounting for linked selection and population structure will be needed. One way  
757 of achieving this objective is to jointly estimate demographic and selection parameters,



758 as proposed in two recent studies relying on simulation based approaches, deep learning  
759 (Sheehan and Song, 2016) and Approximate Bayesian Computation (ABC) (Johri et al.,  
760 2020). These studies focused on relatively simple models, considering panmictic popula-  
761 tions with a single population size change and only some types of selection (background  
762 selection in one study, sweeps and balancing selection in the other). To integrate more  
763 complex demographic scenarios, several recent studies considered interesting approaches,  
764 by assuming demographic models including two classes of  $N_e$  along the genome, one for  
765 neutral loci and one for loci under linked selection. The proportion of the two classes and  
766 the ratio of  $N_e$  between them were estimated together with other parameters of the demo-  
767 graphic model, using either ABC (Rougemont and Bernatchez, 2018, Roux et al., 2016) or  
768 a modification (Rougemont et al., 2020, Rougeux et al., 2017) of the diffusion approach  
769 implemented in the software  $\partial a \partial i$  (Gutenkunst et al., 2009). The models described in  
770 the present study propose another direction for the development of demographic infer-  
771 ence methods by accounting for linked selection through variable classes of  $N_e$  along the  
772 genome, and using the IICR as summary statistic. An IICR-based inference framework  
773 was recently proposed for the estimation of non stationary  $n$ -island models and provided  
774 very encouraging results (Arredondo et al., 2021). Given the strong impact of linked se-  
775 lection on the IICR under panmixia, as described in the present study, we believe that a  
776 similar approach could allow to jointly infer parameters related to demographic history  
777 and to the  $N_e$  distribution. However, the results obtained under models of population  
778 structure suggest that it may be necessary to use the IICR in addition to other summaries  
779 of genomic diversity to overcome identifiability issues. Also, we should stress that sepa-  
780 rating the effects of population size change, selection and population structure is likely to  
781 be one of the major challenges of population genetics in the future.

782 Whether the objective is to predict potential effects of linked selection or to estimate

783 linked selection parameters from real data, two nice features, and possible advantages of  
784 an IICR-based approach such as the one considered here are flexibility and speed of com-  
785 putation. Our approach allows to simultaneously include different forms of selection and  
786 to combine linked selection with arbitrary demographic models. The examples considered  
787 here included stationary panmictic and n-island models (Figure 2 and 4) and non station-  
788 ary island models (Figure 5). We also considered different distributions of  $\lambda_i$  and temporal  
789 variation of  $\lambda_i$ . Our approach can easily be extended to more general structured models  
790 including temporal population size variations. In the case of structured models, variable  
791 migration rates along the genome may be considered, to mimic variation in introgression  
792 rates. Indeed, we could either decreasing  $M$  in the linked selection class to account for  
793 possible effects of selection on migration success or introduce new classes with lower  $M$   
794 values in order to model possible barriers to gene flow (Roux et al., 2016). As outlined  
795 in Figure 6, transient selection can be modelled by including population size changes in  
796 one class, and this approach could also be extended to model more complex fluctuating  
797 selection effects.

798       Whatever the complexity of the model considered, the associated IICR can be com-  
799 puted exactly in a very small time using the rate matrix approach described in (Rodríguez  
800 et al., 2018) or Arredondo et al. (2021), which allows to efficiently explore a very large  
801 number of scenarios or parameter values. As previously mentioned, the main limitation  
802 of the IICR approach described in this study is that it focuses on pairs of sequences.  
803 It provides information that is complementary to that provided by the SFS, as we have  
804 noted elsewhere Arredondo et al. (2021), Chikhi et al. (2018) This means that some ef-  
805 fects of weak background selection or selective sweeps may be visible on the SFS but  
806 not on the IICR. Currently we have mainly focused on the IICR as defined for a pair of  
807 sequences, but extensions to multiple sequences might provide additional information on

808 the distribution of higher order coalescence times ( $T_3, T_4, \dots$ ), hence allowing a finer  
809 characterization of selective and neutral processes.

810 To conclude we have used the IICR as a way to explore important ideas that are  
811 central to population genetics such as the notion of effective size (see also Chikhi et al.  
812 (2018), Mazet et al. (2016) for discussions on these questions), drift and selection. We  
813 wished to re-open discussions regarding the influence of selective and neutral processes on  
814 genetic diversity, some of them general and theoretical, others more specific and practical:  
815 Can selection be modelled as a genomic variation in  $N_e$ ? What are the limits of such  
816 an approximation? How robust is it? Does an IICR perspective provide interesting  
817 outcomes? Can  $N_e$  variation along the genome be detected in real genomes by applying  
818 the PSMC method of (Li and Durbin, 2011) or related approaches? Can we infer the  
819 presence of linked selection in humans from the PSMC plots or SFS histograms observed  
820 in this and other species? These are exciting questions to ask and the recent years have  
821 shown that they are at the heart of modern population genetics.

## 822 **Data availability statement**

823 Code used to generate the exact and simulated IICRs shown in this study can be found  
824 at [https://github.com/sboitard/IICR\\_selection](https://github.com/sboitard/IICR_selection).

## 825 **Acknowledgements**

826 Armando Arredondo was funded by the Université Fédérale Toulouse Midi Pyrénées  
827 (UFTMiP) and the Région Occitanie (formerly Midi-Pyrénées) with PhD grant No.  
828 31I2017M248. Lounès Chikhi was funded by Fundação para a Ciência e Tecnologia (ref.

829 PTDC-BIA-EVL/30815/2017). Olivier Mazet and Lounès Chikhi were funded by the  
830 2015–2016 BiodivERsA COFUND call for research proposals, with the national funders  
831 ANR (ANR-16-EBI3-0014) and the Fundação para a Ciência e Tecnologia ref. Bio-  
832 diversa/0003/2015 and PT-DLR (01LC1617A). This work was also supported by the  
833 LABEX entitled TULIP (ANR-10-LABX-41 and ANR-11-IDEX-0002-02) as well as the  
834 LIA BEEG-B (Laboratoire International Associé-Bioinformatics, Ecology, Evolution, Ge-  
835 nomics and Behaviour). We acknowledge an Investissement d’Avenir grant of the Agence  
836 Nationale de la Recherche (CEBA: ANR-10-LABX-25-01).

## 837 **Supplementary Material**

### 838 **Derivation of the pdf of $T_2$ in a $n$ -island model**

839 We derive here the pdf density of  $T_2$ , the coalescence time of two lineages sampled in the  
840 same deme (resp. different deme), in an  $n$ -island model. We follow the identity by descent  
841 approach used in Durrett’s process (Durrett, 2008, p. 150). The size of each deme is  $\lambda N$ ,  
842 the probability of each lineage to migrate from a deme to another each generation is  $m$ ,  
843 and the per locus mutation rate is  $u$ . Define the rescaled mutation and migration rates  
844 by  $\theta = 4Nu$  and  $M = 4Nm$ . Note that two lineages coalesce at rate  $c = \frac{1}{\lambda}$  when they  
845 are in the same deme, migrate at rate  $2m \cdot 2N = M$  and experience mutations at rate  
846  $2u \cdot 2N = \theta$ .

847 Let  $p_s(\theta)$  and  $p_d(\theta)$  be the probabilities that two lineages are identical by descent  
848 when they are chosen in the same or different demes. Following back two lineages from  
849 the same deme, three different events can occur: a coalescence with probability  $\frac{c}{c+\theta+M}$ ,  
850 a migration with probability  $\frac{M}{c+\theta+M}$  and a mutation with probability  $\frac{\theta}{c+\theta+M}$ . If lineages  
851 are in different demes, the only possible events are mutation, with probability  $\frac{\theta}{\theta+M}$  and

852 migration. In this second case lineages arrive in the same deme with probability  $\frac{1}{n-1}$  and  
 853 stay in different ones with probability  $\frac{n-2}{n-1}$ . Hence we have the two coupled equations:

$$p_s(\theta) = \frac{c}{c + M + \theta} \cdot 1 + \frac{M}{c + M + \theta} \cdot p_d(\theta),$$

854 and

$$p_d(\theta) = \frac{M/(n-1)}{M + \theta} \cdot p_s(\theta) + \frac{M(n-2)/(n-1)}{M + \theta} \cdot p_d(\theta).$$

855 The second equation gives

$$\begin{aligned} \left(1 - \frac{M(n-2)}{(n-1)(M + \theta)}\right) p_d(\theta) &= \frac{M}{(n-1)(M + \theta)} p_s(\theta) \\ \Leftrightarrow \frac{\theta(n-1) + M}{(n-1)(M + \theta)} p_d(\theta) &= \frac{M}{(n-1)(M + \theta)} p_s(\theta) \\ \Leftrightarrow p_d(\theta) &= \frac{M}{\theta(n-1) + M} p_s(\theta). \end{aligned}$$

856 We then inject in the first equation:

$$p_s(\theta) = \frac{c}{c + M + \theta} + \frac{M}{c + M + \theta} \frac{M}{\theta(n-1) + M} p_s(\theta)$$

857 hence

$$p_s \left(1 - \frac{M^2}{(c + M + \theta)(\theta(n-1) + M)}\right) = \frac{c}{c + M + \theta}$$

858 and since

$$(c + M + \theta)(\theta(n-1) + M) - M^2 = \theta^2(n-1) + \theta(c(n-1) + Mn) + cM,$$

859 we get

$$p_s = \frac{c(\theta(n-1) + M)}{\theta^2(n-1) + \theta(c(n-1) + Mn) + cM} = \frac{c(\theta + \gamma)}{\theta^2 + \theta(c + n\gamma) + c\gamma}$$

860 and

$$p_d = \frac{cM}{\theta^2(n-1) + \theta(c(n-1) + Mn) + cM} = \frac{c\gamma}{\theta^2 + \theta(c + n\gamma) + c\gamma}$$

861 with

$$\gamma = \frac{M}{n-1}.$$

862 Let's now note that the probability  $p_s(\theta)$  that two lineages has reached their common  
863 ancestor without undergoing any mutation is also the expected value  $\mathbb{E}(e^{\theta T_2})$ . In other  
864 words,  $p_s$  is the Laplace transform of  $T_2$ . It can be inverted by looking for the roots of  
865  $\theta^2 + \theta(c + n\gamma) + c\gamma$ . Let  $\Delta = (c + n\gamma)^2 - 4c\gamma$ , then

$$p_s(\theta) = \frac{c(\theta + \gamma)}{(\theta + \alpha)(\theta + \beta)} = \frac{a}{\theta + \alpha} + \frac{b}{\theta + \beta}$$

866 with

$$\alpha = \frac{1}{2} (c + n\gamma + \sqrt{\Delta}),$$

$$\beta = \frac{1}{2} (c + n\gamma - \sqrt{\Delta}),$$

$$a = \frac{c(\gamma - \alpha)}{\beta - \alpha}$$

867 and

$$b = \frac{c(\gamma - \beta)}{\alpha - \beta} = c - a.$$

868 Hence the probability density function of  $T_2$  is:

$$f_{T_2}(t) = ae^{-\alpha t} + (c - a)e^{-\beta t}.$$

869 Note that  $-\alpha$  and  $-\beta$  are the non zero eigenvalues of the Q-matrix,  $-\beta$  being the  
870 closest to 0, and we have the relationships  $\alpha + \beta = c + n\gamma$  and  $\alpha\beta = c\gamma$ . Note also that we  
871 could similarly obtain the pdf distribution of the coalescence time of two lineages sampled  
872 in different demes, as  $p_d$  is its Laplace transform as well.

873 **Supplementary figures**

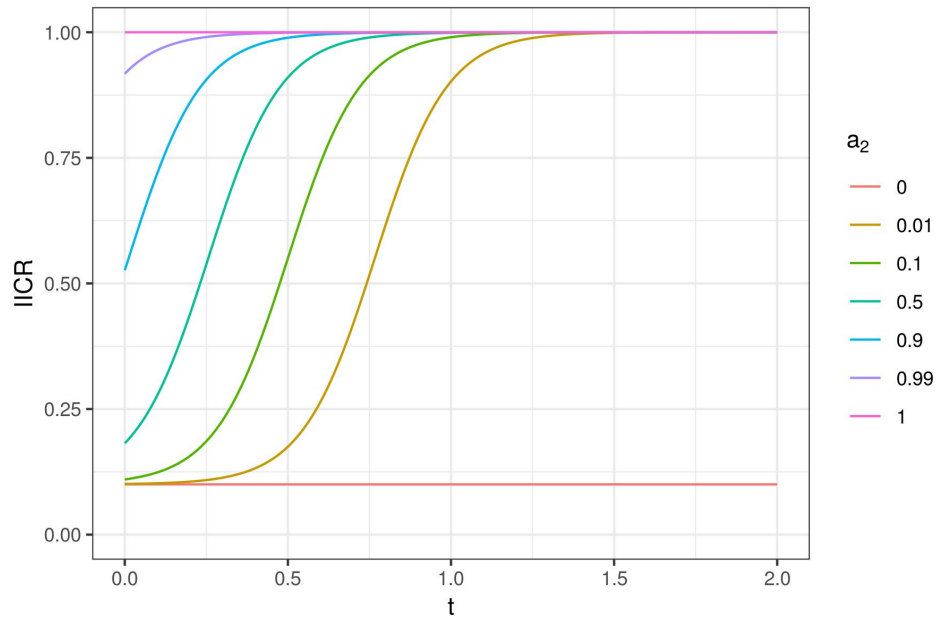

Figure S1: IICR curves for a panmictic model with  $K = 2$  classes of genomic regions with constant size. Same as Figure 1 except that time is plotted in natural scale.



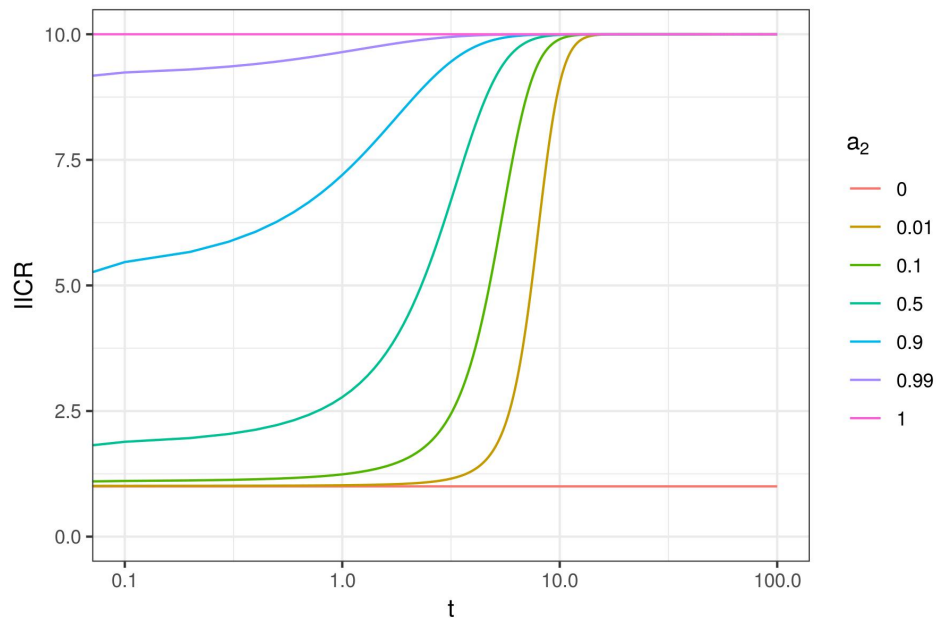

Figure S2: IICR curves for a panmictic model with  $K = 2$  classes of genomic regions with constant size. Same as Figure 1 with  $\lambda_1 = 1$ ,  $\lambda_2 = 10$  and time from 0 to 100 (in log10 scale)

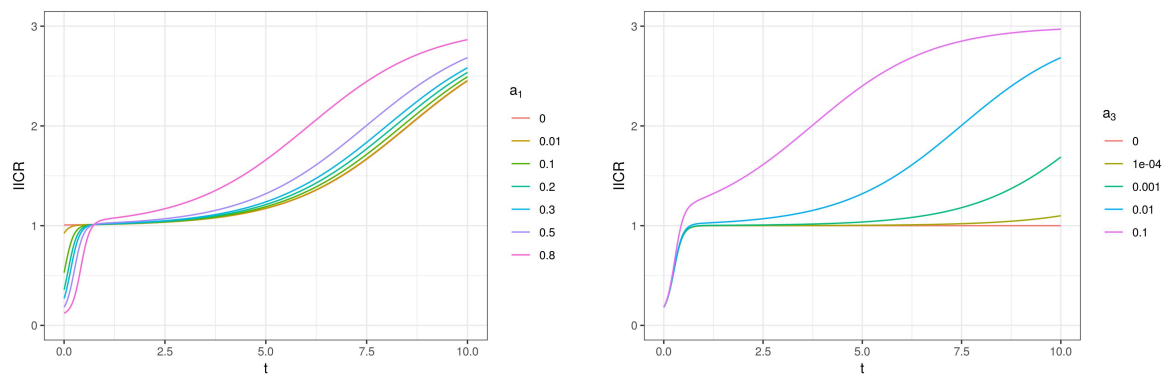

Figure S3: IICR for a panmictic model with  $K = 3$   $\lambda_i$  values such that  $\lambda_1 < 1$ ,  $\lambda_2 = 1$  and  $\lambda_3 > 1$ . Same as Figure 2 except that time is plotted in natural scale.

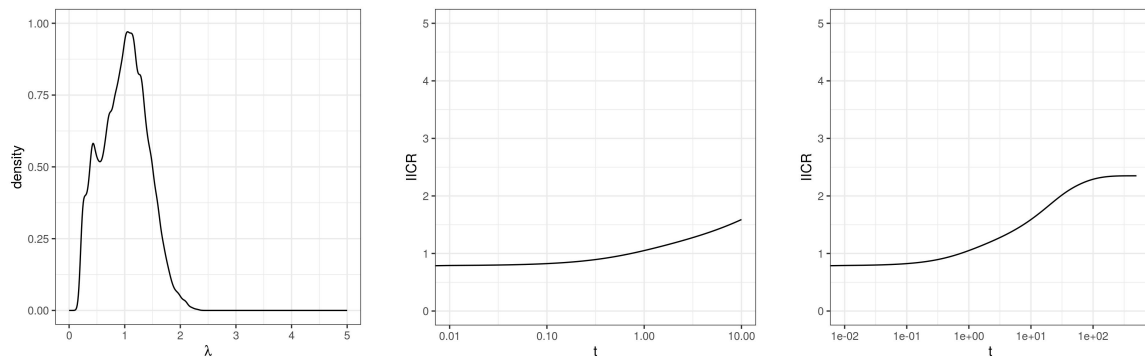

Figure S4: IICR obtained when removing low  $N_e$  values from the distribution estimated by Elyashiv et al. (2016). This truncated distribution (rescaled to have a mean of 1 as the others) is shown on the left panel. The associated IICR is shown until  $t = 10$  (middle panel) or  $t = 500$  (right panel), in log<sub>10</sub> scale.

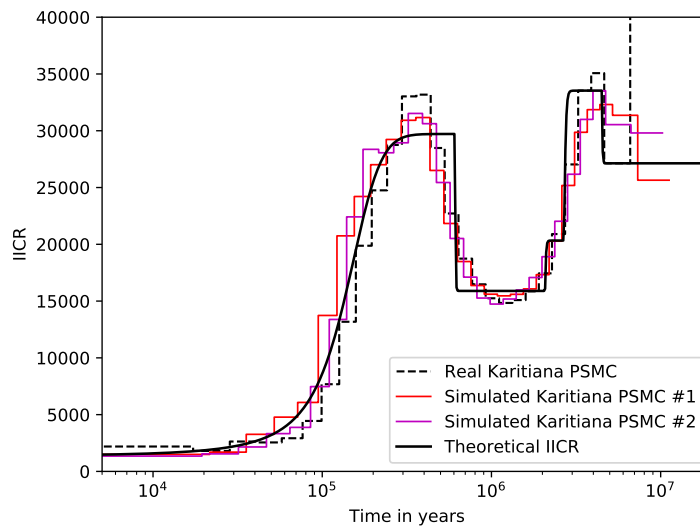

Figure S5: PSMC curves of simulated data under a non-stationary n-island model. We show in black the exact IICR corresponding to an inferred n-island model for a Karitiana individual in Arredondo et al. (2021). In color, we show various PSMC curves obtained by independently simulating genomic sequences under this structured model. The real PSMC curve for this Karitiana individual is represented by the dashed plot (Prado-Martinez et al., 2013). The horizontal axis is scaled in years, with a generation time of 25 years.

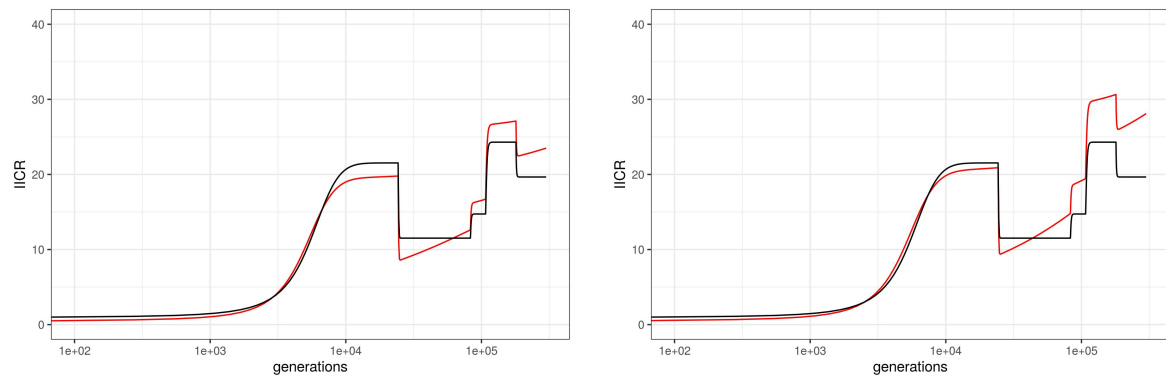

Figure S6: IICRs for demographic models combining population structure and linked selection in humans. Same as Figure 5, bottom panel, except that  $\lambda$  values greater than 2 (left) or 3 (right) were filtered out from the distribution in order to mimic a situation where loci under balancing selection could be detected and removed before computing the IICR. The resulting truncated distribution was rescaled.

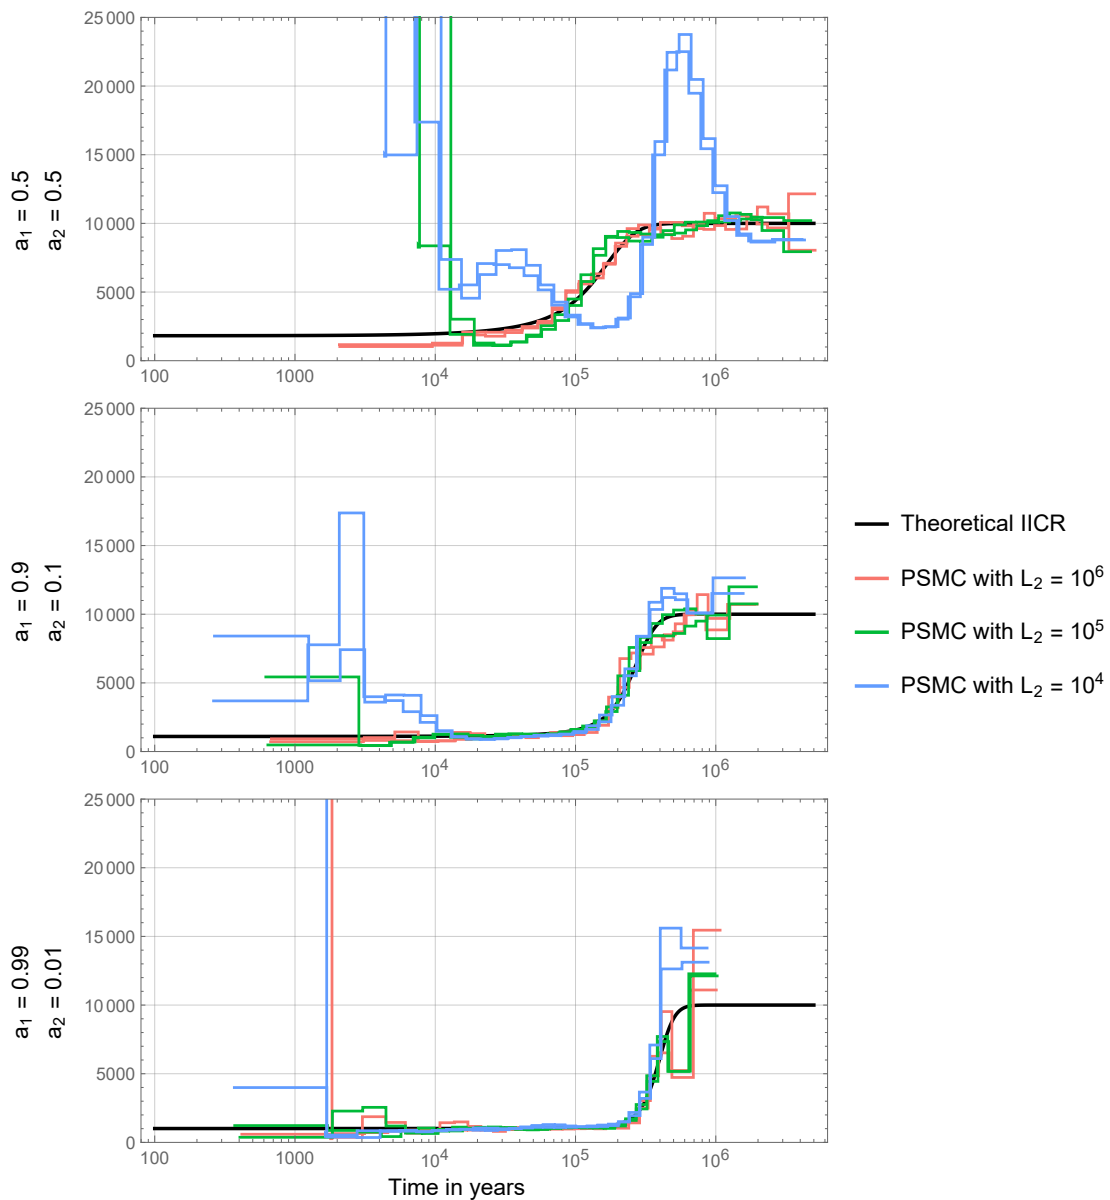

Figure S7: Comparison between theoretical IICR and inferred PSMC. For each frequency distribution  $(a_1, a_2)$  of the two size classes  $\lambda_1 = 1$  and  $\lambda_2 = 10$  we show the corresponding theoretical IICR (black) and two independent PSMC simulations for three variations of the chunk length  $L_2$ . In each case,  $L_1 = \frac{a_1}{a_2} L_2$ ; the simulated sequence has a total length of  $10^9$  base pairs and the two class chunks are evenly alternated in the form  $(L_1, L_2, L_1, \dots, L_2)$ . The effective size  $N_1$  was chosen as 1000. The horizontal axis is scaled in years, with a generation time of 25 years.

## 874 **References**

- 875 Arredondo, A., Mourato, B., Nguyen, K., Boitard, S., Valcarce, W. R. R., Noûs, C.,  
876 Mazet, O., and Chikhi, L. (2021). Inferring number of populations and changes in  
877 connectivity under the n-island model. *Heredity*.
- 878 Charlesworth, B. (2009). Effective population size and patterns of molecular evolution  
879 and variation. *Nature Reviews Genetics*, 10(3):195.
- 880 Charlesworth, B. (2010). *Elements of evolutionary genetics*. Roberts Publishers.
- 881 Charlesworth, B., Morgan, M., and Charlesworth, D. (1993). The effect of deleterious  
882 mutations on neutral molecular variation. *Genetics*, 134(4):1289–1303.
- 883 Chikhi, L., Rodriguez, W., Grusea, S., Santos, P., Boitard, S., and Mazet, O. (2018).  
884 The IICR (inverse instantaneous coalescence rate) as a summary of genomic diversity:  
885 insights into demographic inference and model choice. *Heredity*, 120:13–24.
- 886 Comeron, J. M. (2017). Background selection as null hypothesis in population genomics:  
887 insights and challenges from drosophila studies. *Philosophical Transactions of the Royal  
888 Society B: Biological Sciences*, 372(1736):20160471.
- 889 Durrett, R. (2008). *Probability models for DNA sequence evolution*. Springer.
- 890 Elyashiv, E., Sattath, S., Hu, T. T., Strutsosky, A., McVicker, G., Andolfatto, P., Coop,  
891 G., and Sella, G. (2016). A genomic map of the effects of linked selection in drosophila.  
892 *PLoS genetics*, 12(8):e1006130.
- 893 Ewing, G. and Hermisson, J. (2010). Msms: a coalescent simulation program including  
894 recombination, demographic structure and selection at a single locus. *Bioinformatics*,  
895 26(16):2064–2065.

- 896 Ewing, G. B. and Jensen, J. D. (2016). The consequences of not accounting for background  
897 selection in demographic inference. *Molecular ecology*, 25(1):135–141.
- 898 Gossmann, T. I., Woolfit, M., and Eyre-Walker, A. (2011). Quantifying the variation in  
899 the effective population size within a genome. *Genetics*, 189(4):1389–1402.
- 900 Grusea, S., Rodriguez, W., Boitard, S., Chikhi, L., and Mazet, O. (2018). Coalescence  
901 times for three genes are sufficient to detect population structure. *Journal of Mathe-*  
902 *matical Biology*, xxx(x):xxx–xxx.
- 903 Gutenkunst, R. N., Hernandez, R. D., Williamson, S. H., and Bustamante, C. D. (2009).  
904 Inferring the joint demographic history of multiple populations from multidimensional  
905 SNP frequency data. *PLoS Genetics*, 5(10):e1000695.
- 906 Herbots, H. M. J. D. (1994). *Stochastic models in population genetics: genealogy and*  
907 *genetic differentiation in structured populations*. PhD thesis.
- 908 Hill, W. G. and Robertson, A. (1966). The effect of linkage on limits to artificial selection.  
909 *Genetical Research*, 8(3):269–294.
- 910 Jensen, J. D., Payseur, B. A., Stephan, W., Aquadro, C. F., Lynch, M., Charlesworth,  
911 D., and Charlesworth, B. (2019). The importance of the neutral theory in 1968 and 50  
912 years on: a response to kern and hahn 2018. *Evolution*, 73(1):111–114.
- 913 Jiménez-Mena, B., Bataillon, T., et al. (2016a). Heterogeneity in effective population  
914 size and its implications in conservation genetics and animal breeding. *Conservation*  
915 *genetics resources*, 8(1):35–41.
- 916 Jiménez-Mena, B., Tataru, P., Brøndum, R. F., Sahana, G., Guldbbrandtsen, B., and

- 917 Bataillon, T. (2016b). One size fits all? direct evidence for the heterogeneity of genetic  
918 drift throughout the genome. *Biology letters*, 12(7):20160426.
- 919 Johri, P., Charlesworth, B., and Jensen, J. D. (2020). Toward an evolutionarily appro-  
920 priate null model: Jointly inferring demography and purifying selection. *Genetics*,  
921 215(1):173–192.
- 922 Johri, P., Riall, K., Becher, H., Excoffier, L., Charlesworth, B., and Jensen, J. D. (2021).  
923 The impact of purifying and background selection on the inference of population history:  
924 problems and prospects. *Molecular Biology and Evolution*. msab050.
- 925 Kaplan, N. L., Darden, T., and Hudson, R. R. (1988). The coalescent process in models  
926 with selection. *Genetics*, 120(3):819–829.
- 927 Kern, A. D. and Hahn, M. W. (2018). The neutral theory in light of natural selection.  
928 *Molecular biology and evolution*, 35(6):1366–1371.
- 929 Kimura, M. (1983). *The neutral theory of molecular evolution*. Cambridge University  
930 Press.
- 931 Lapierre, M., Blin, C., Lambert, A., Achaz, G., and Rocha, E. P. (2016). The impact of  
932 selection, gene conversion, and biased sampling on the assessment of microbial demog-  
933 raphy. *Molecular biology and evolution*, 33(7):1711–1725.
- 934 Lewontin, R. C. (1974). *The genetic basis of evolutionary change*, volume 560. Columbia  
935 University Press New York.
- 936 Li, H. and Durbin, R. (2011). Inference of human population history from individual  
937 whole-genome sequences. *Nature*, 475(7357):493–496.



- 938 Mazet, O., Rodriguez, W., Grusea, S., Boitard, S., and Chikhi, L. (2016). On the im-  
939 portance of being structured: instantaneous coalescence rates and human evolution—  
940 lessons for ancestral population size inference. *Heredity*, 116(4):362–371.
- 941 Nielsen, R., Williamson, S., Kim, Y., Hubisz, M. J., Clark, A. G., and Bustamante,  
942 C. (2005). Genomic scans for selective sweeps using snp data. *Genome research*,  
943 15(11):1566–1575.
- 944 Ohta, T. (1992). The nearly neutral theory of molecular evolution. *Annual review of*  
945 *ecology and systematics*, 23(1):263–286.
- 946 Pouyet, F., Aeschbacher, S., Thiéry, A., and Excoffier, L. (2018). Background selec-  
947 tion and biased gene conversion affect more than 95% of the human genome and bias  
948 demographic inferences. *Elife*, 7:e36317.
- 949 Prado-Martinez, J., Sudmant, P. H., Kidd, J. M., Li, H., Kelley, J. L., Lorente-Galdos,  
950 B., Veeramah, K. R., Woerner, A. E., O’Connor, T. D., Santpere, G., et al. (2013).  
951 Great ape genetic diversity and population history. *Nature*, 499(7459):471–475.
- 952 Rodríguez, W., Mazet, O., Grusea, S., Arredondo, A., Corujo, J. M., Boitard, S., and  
953 Chikhi, L. (2018). The iicr and the non-stationary structured coalescent: towards demo-  
954 graphic inference with arbitrary changes in population structure. *Heredity*, 121(6):663.
- 955 Rougemont, Q. and Bernatchez, L. (2018). The demographic history of atlantic salmon  
956 (*salmo salar*) across its distribution range reconstructed from approximate bayesian  
957 computations. *Evolution*, 72(6):1261–1277.
- 958 Rougemont, Q., Moore, J.-S., Leroy, T., Normandeau, E., Rondeau, E. B., Withler,  
959 R. E., Van Doornik, D. M., Crane, P. A., Naish, K. A., Garza, J. C., et al. (2020).

- 960 Demographic history shaped geographical patterns of deleterious mutation load in a  
961 broadly distributed pacific salmon. *PLoS genetics*, 16(8):e1008348.
- 962 Rougeux, C., Bernatchez, L., and Gagnaire, P.-A. (2017). Modeling the multiple facets  
963 of speciation-with-gene-flow toward inferring the divergence history of lake whitefish  
964 species pairs (*coregonus clupeaformis*). *Genome biology and evolution*, 9(8):2057–2074.
- 965 Roux, C., Fraïsse, C., Romiguier, J., Anciaux, Y., Galtier, N., and Bierne, N. (2016).  
966 Shedding light on the grey zone of speciation along a continuum of genomic divergence.  
967 *PLOS Biology*, 14(12):1–22.
- 968 Schiffels, S. and Durbin, R. (2013). Inferring human population size and separation history  
969 from multiple genome sequences. *Nature Genetics*, 8(46):919–925.
- 970 Schrider, D. R., Shanku, A. G., and Kern, A. D. (2016). Effects of linked selective sweeps  
971 on demographic inference and model selection. *Genetics*, 204(3):1207–1223.
- 972 Sheehan, S. and Song, Y. S. (2016). Deep learning for population genetic inference. *PLoS*  
973 *computational biology*, 12(3):e1004845.
- 974 Sjödin, P., Kaj, I., Krone, S., Lascoux, M., and Nordborg, M. (2005). On the meaning  
975 and existence of an effective population size. *Genetics*, 169(2):1061–1070.
- 976 Smith, J. M. and Haigh, J. (1974). The hitch-hiking effect of a favourable gene. *Genetics*  
977 *Research*, 23(1):23–35.
- 978 Walczak, A. M., Nicolaisen, L. E., Plotkin, J. B., and Desai, M. M. (2012). The structure  
979 of genealogies in the presence of purifying selection: a fitness-class coalescent. *Genetics*,  
980 190(2):753–779.

981 Walsh, B. and Lynch, M. (2018). *Evolution and selection of quantitative traits*. Oxford  
982 University Press.

983 Zeng, K. and Charlesworth, B. (2011). The joint effects of background selection and  
984 genetic recombination on local gene genealogies. *Genetics*, 189(1):251–266.
